# Supplementary material for: Tetranuclear Copper(I) and Silver(I) Pyrazolate Adducts with 1,1′-Dimethyl-2,2’-bibenzimidazole: Influence of Structure on Photophysics
Source: MDPI journal article supplement (doi:10.3390/molecules28031189), 2023-01-25
Supplement: s1 [file s1]

## Supporting Information for

Tetranuclear copper(I) and silver(I) pyrazolate adducts with 1,1'-Dimethyl-2,2'-bibenzimidazole: influence of structure on photophysics

Gleb B. Yakovlev<sup>1</sup>, Aleksei A. Titov<sup>\*1</sup>, Alexander F. Smol'yakov<sup>1</sup>, Andrey Yu. Chernyadyev<sup>2</sup>, Oleg A. Filippov<sup>1</sup>, Elena S. Shubina<sup>1</sup>

<sup>1</sup> A. N. Nesmeyanov Institute of Organoelement Compounds, Russian Academy of Sciences, Vavilov Str., 28,

119991 Moscow, Russia; gleb240602@mail.ru (G.B.Y.); tit@ineos.ac.ru (A.A.T.); h-bond@ineos.ac.ru (O.A.F.);

rengenhik@gmail.com (A.F.S.), shu@ineos.ac.ru (E.S.S.);

<sup>2</sup> A. N. Frumkin Institute of Physical Chemistry and Electrochemistry, Russian Academy of Sciences,

Leninsky prosp. 31/4, 199071 Moscow, Russia; chernyadyev@mail.ru (A. Y. C.);

\* Correspondence: tit@ineos.ac.ru (A.A.T.)

Table S1. Crystal data, data collection, and structure refinement parameters for 1-4

| Complex                                     | 1                                                                               | 2                                                                               | 3                                                                               | 5                                                                               |
|---------------------------------------------|---------------------------------------------------------------------------------|---------------------------------------------------------------------------------|---------------------------------------------------------------------------------|---------------------------------------------------------------------------------|
| Empirical formula                           | C <sub>52</sub> H <sub>32</sub> Cu <sub>4</sub> F <sub>24</sub> N <sub>16</sub> | C <sub>36</sub> H <sub>18</sub> Cu <sub>4</sub> F <sub>24</sub> N <sub>12</sub> | C <sub>52</sub> H <sub>32</sub> Ag <sub>4</sub> F <sub>24</sub> N <sub>16</sub> | C <sub>36</sub> H <sub>18</sub> Ag <sub>4</sub> F <sub>24</sub> N <sub>12</sub> |
| Formula weight                              | 1591.09                                                                         | 1328.78                                                                         | 1768.41                                                                         | 1506.1                                                                          |
| Temperature/K                               | 100                                                                             | 100                                                                             | 100                                                                             | 120                                                                             |
| Crystal system                              | tetragonal                                                                      | monoclinic                                                                      | monoclinic                                                                      | monoclinic                                                                      |
| Space group                                 | I-4                                                                             | C2/c                                                                            | Cc                                                                              | Cc                                                                              |
| a/Å                                         | 12.1309(4)                                                                      | 34.6187(7)                                                                      | 23.491(2)                                                                       | 12.460(2)                                                                       |
| b/Å                                         | 12.1309(4)                                                                      | 12.5461(3)                                                                      | 12.2873(11)                                                                     | 23.856(4)                                                                       |
| c/Å                                         | 19.7184(12)                                                                     | 21.1280(4)                                                                      | 22.922(2)                                                                       | 15.954(3)                                                                       |
| $\alpha$ /°                                 | 90                                                                              | 90                                                                              | 90                                                                              | 90                                                                              |
| $\beta$ /°                                  | 90                                                                              | 96.2900(10)                                                                     | 115.291(5)                                                                      | 92.364(4)                                                                       |
| $\gamma$ /°                                 | 90                                                                              | 90                                                                              | 90                                                                              | 90                                                                              |
| Volume/Å <sup>3</sup>                       | 2901.7(3)                                                                       | 9121.3(3)                                                                       | 5982.0(10)                                                                      | 4738.3(13)                                                                      |
| Z                                           | 2                                                                               | 8                                                                               | 4                                                                               | 4                                                                               |
| $\rho_{\text{calc}}/\text{cm}^3$            | 1.821                                                                           | 1.935                                                                           | 1.964                                                                           | 2.111                                                                           |
| $\mu/\text{mm}^{-1}$                        | 1.578                                                                           | 1.984                                                                           | 1.418                                                                           | 1.767                                                                           |
| F(000)                                      | 1576                                                                            | 5200                                                                            | 3440                                                                            | 2888                                                                            |
| Crystal size/mm <sup>3</sup>                | 0.16 × 0.15 × 0.14                                                              | 0.22 × 0.14 × 0.09                                                              | 0.18 × 0.14 × 0.09                                                              | 0.25 × 0.18 × 0.14                                                              |
| Radiation                                   | MoK $\alpha$ ( $\lambda$ = 0.71073)                                             |
| 2 $\Theta$ range for data collection/°      | 3.942 to 51.966                                                                 | 3.456 to 59.288                                                                 | 3.83 to 51.998                                                                  | 3.69 to 51.998                                                                  |
| Reflections collected                       | 13361                                                                           | 63273                                                                           | 17325                                                                           | 17279                                                                           |
| Independent reflections                     | 2845 [R <sub>int</sub> = 0.0688, R <sub>sigma</sub> = 0.0518]                   | 12863 [R <sub>int</sub> = 0.0640, R <sub>sigma</sub> = 0.0531]                  | 17325 [R <sub>int</sub> = 0.0640, R <sub>sigma</sub> = 0.1215]                  | 8393 [R <sub>int</sub> = 0.0503, R <sub>sigma</sub> = 0.0704]                   |
| Data/restraints/parameters                  | 2845/18/219                                                                     | 12863/0/687                                                                     | 17325/164/870                                                                   | 8393/2/688                                                                      |
| Goodness-of-fit on F <sup>2</sup>           | 1.116                                                                           | 1.031                                                                           | 1.039                                                                           | 1.031                                                                           |
| Final R indexes [I > 2 $\sigma$ (I)]        | R <sub>1</sub> = 0.1108, wR <sub>2</sub> = 0.2922                               | R <sub>1</sub> = 0.0452, wR <sub>2</sub> = 0.1054                               | R <sub>1</sub> = 0.0773, wR <sub>2</sub> = 0.1879                               | R <sub>1</sub> = 0.0519, wR <sub>2</sub> = 0.1345                               |
| Final R indexes [all data]                  | R <sub>1</sub> = 0.1114, wR <sub>2</sub> = 0.2925                               | R <sub>1</sub> = 0.0688, wR <sub>2</sub> = 0.1161                               | R <sub>1</sub> = 0.0984, wR <sub>2</sub> = 0.2033                               | R <sub>1</sub> = 0.0572, wR <sub>2</sub> = 0.1422                               |
| Largest diff. peak/hole / e Å <sup>-3</sup> | 1.51/-1.82                                                                      | 1.82/-1.03                                                                      | 2.76/-1.58                                                                      | 2.08/-1.80                                                                      |

298 K

77 K

1

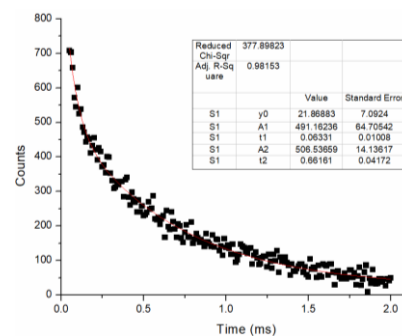

2

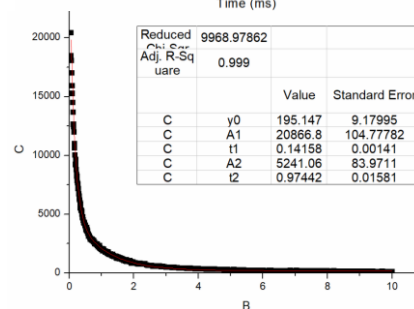

3

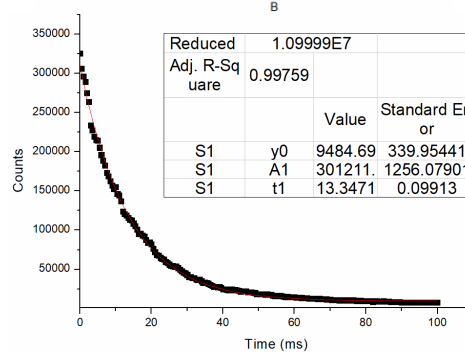

4

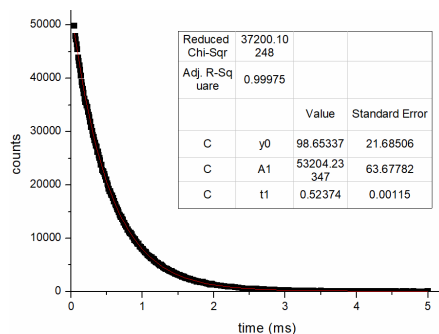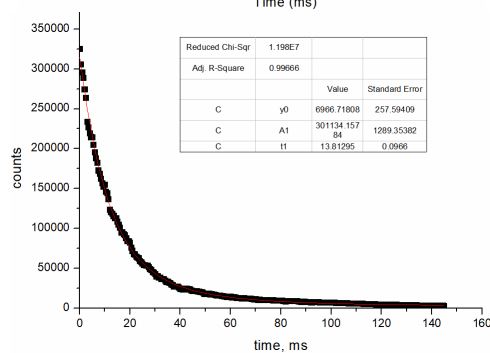

Figure S1. Phosphorescence decays of complexes 1-4 in the solid state at 298 K and 77 K.

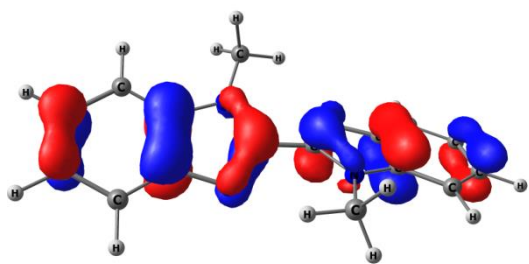

S1 HONTO ( $E=37799.2 \text{ cm}^{-1}$ , 264.6 nm,  $f=1.3104$ )

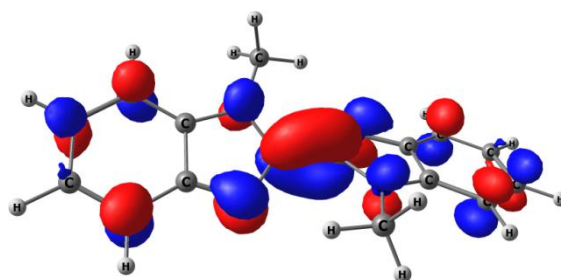

LUNTO

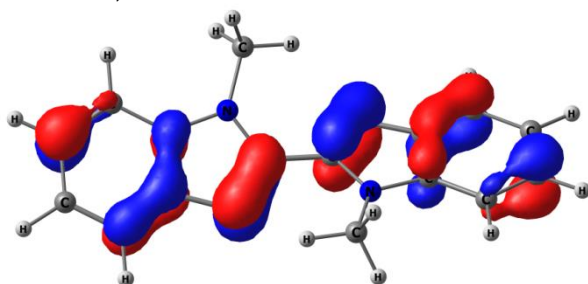

T1 HONTO  $E=29735.5 \text{ cm}^{-1}$ , 336.3 nm

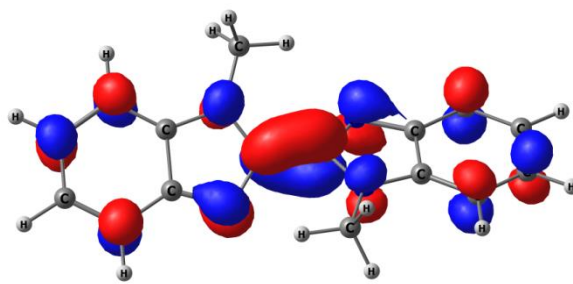

LUNTO

Figure S2. Natural transition orbitals HONTO (left) and LUNTO (right) for  $S_0 \rightarrow S_1$  excitation of anti-geometry of **L** as isosurface at 0.05 a.u.

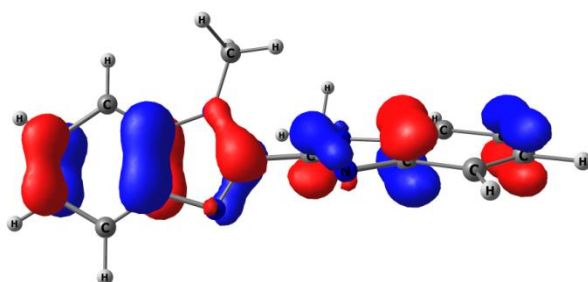

S1 HONTO ( $E=40328.8 \text{ cm}^{-1}$ , 248.0 nm,  $f=0.9691$ )

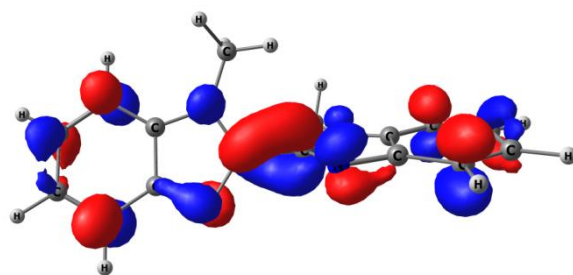

LUNTO

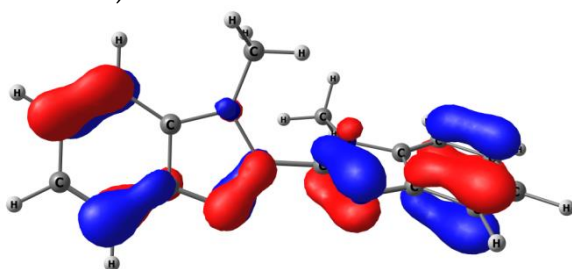

T1 HONTO  $E=30987.7 \text{ cm}^{-1}$ , 322.7 nm

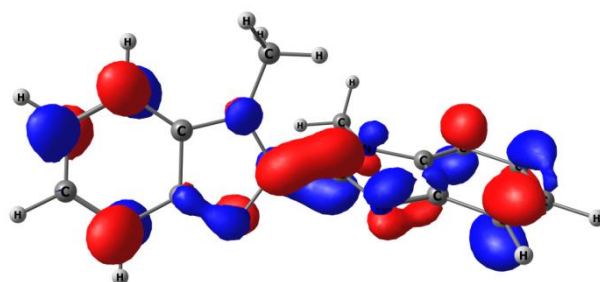

LUNTO

Figure S3. Natural transition orbitals HONTO (left) and LUNTO (right) for  $S_0 \rightarrow S_1$  excitation of syn-geometry of **L** as isosurface at 0.05 a.u.

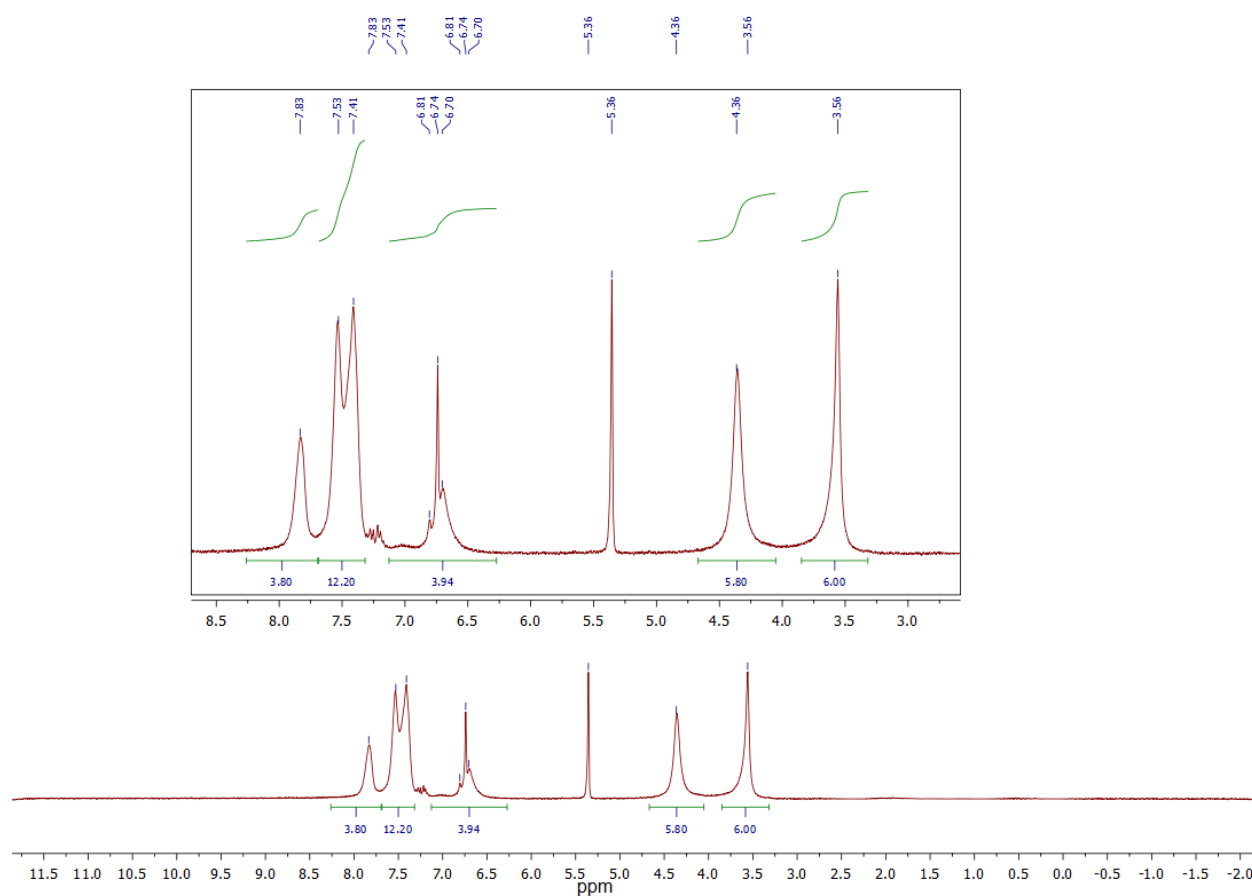

Figure S4. <sup>1</sup>H NMR spectrum of **1** in CD<sub>2</sub>Cl<sub>2</sub>.

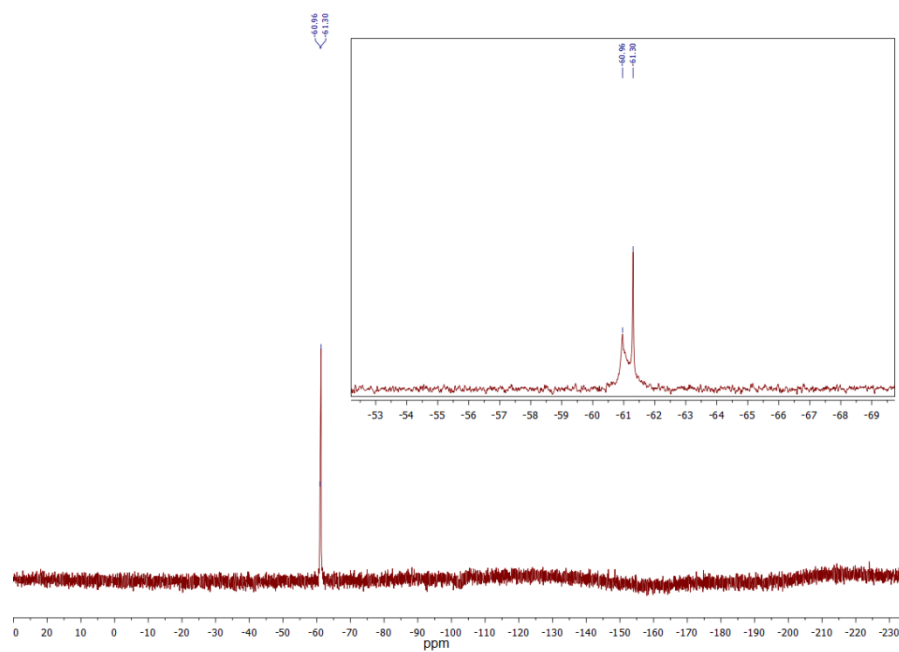

Figure S5. <sup>1</sup>F NMR spectrum of **1** in CD<sub>2</sub>Cl<sub>2</sub>.

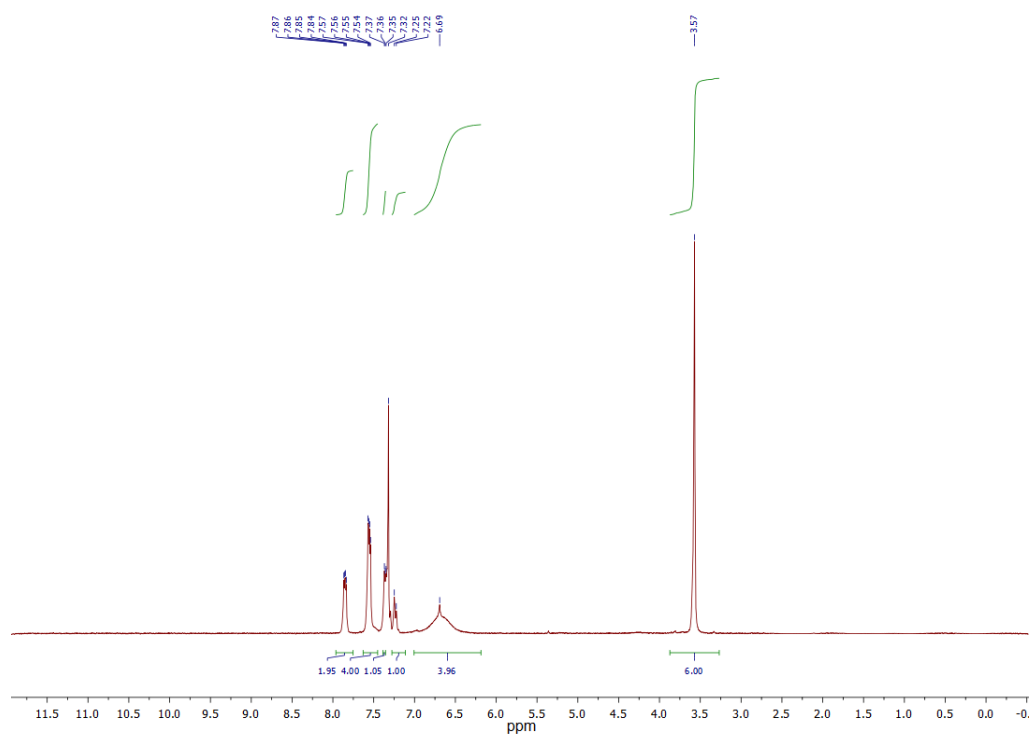

Figure S6. <sup>1</sup>H NMR spectrum of **2** in CDCl<sub>3</sub>.

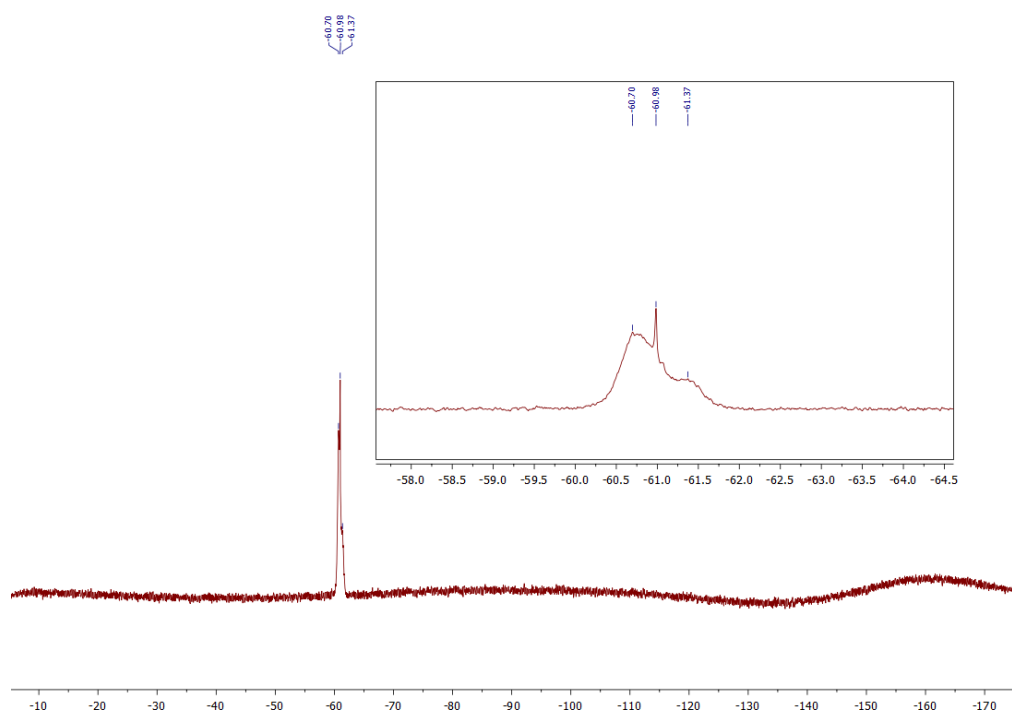

Figure S7. <sup>19</sup>F NMR spectrum of **2** in CDCl<sub>3</sub>.

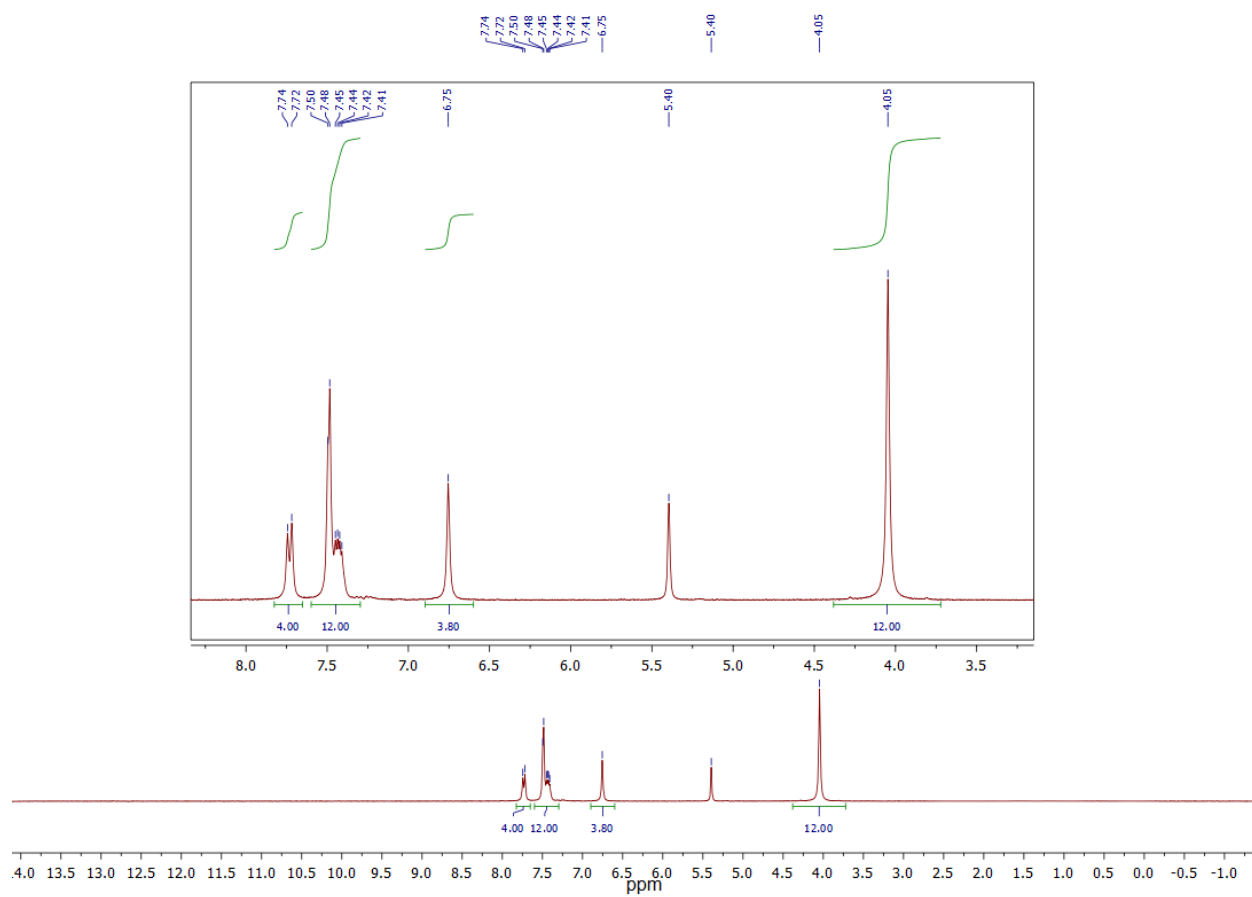

Figure S8. <sup>1</sup>H NMR spectrum of **3** in CD<sub>2</sub>Cl<sub>2</sub>.

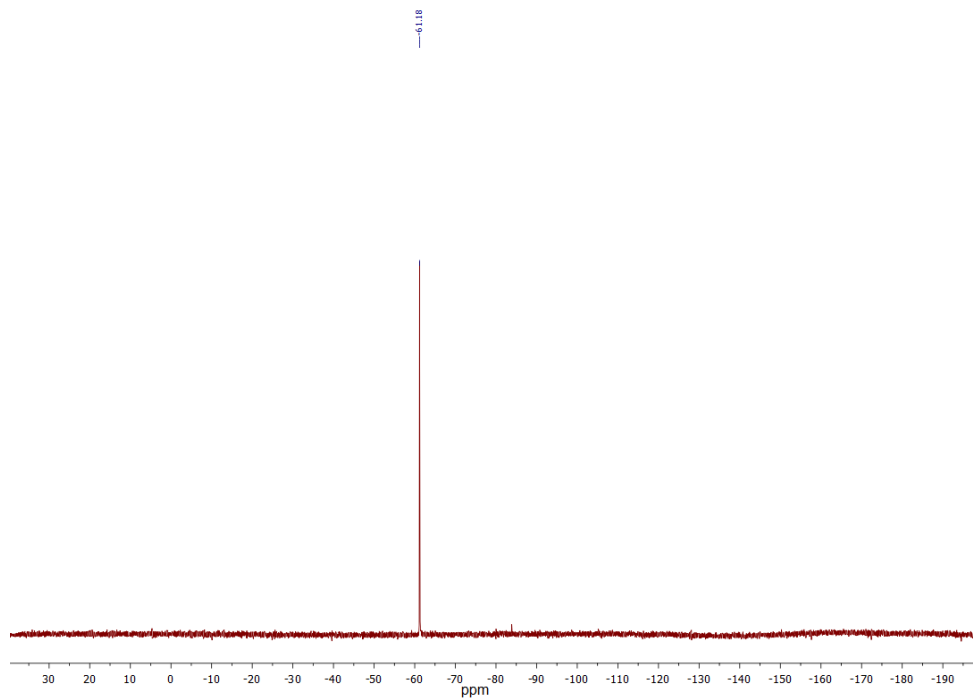

Figure S9. <sup>19</sup>F NMR spectrum of **3** in CD<sub>2</sub>Cl<sub>2</sub>.

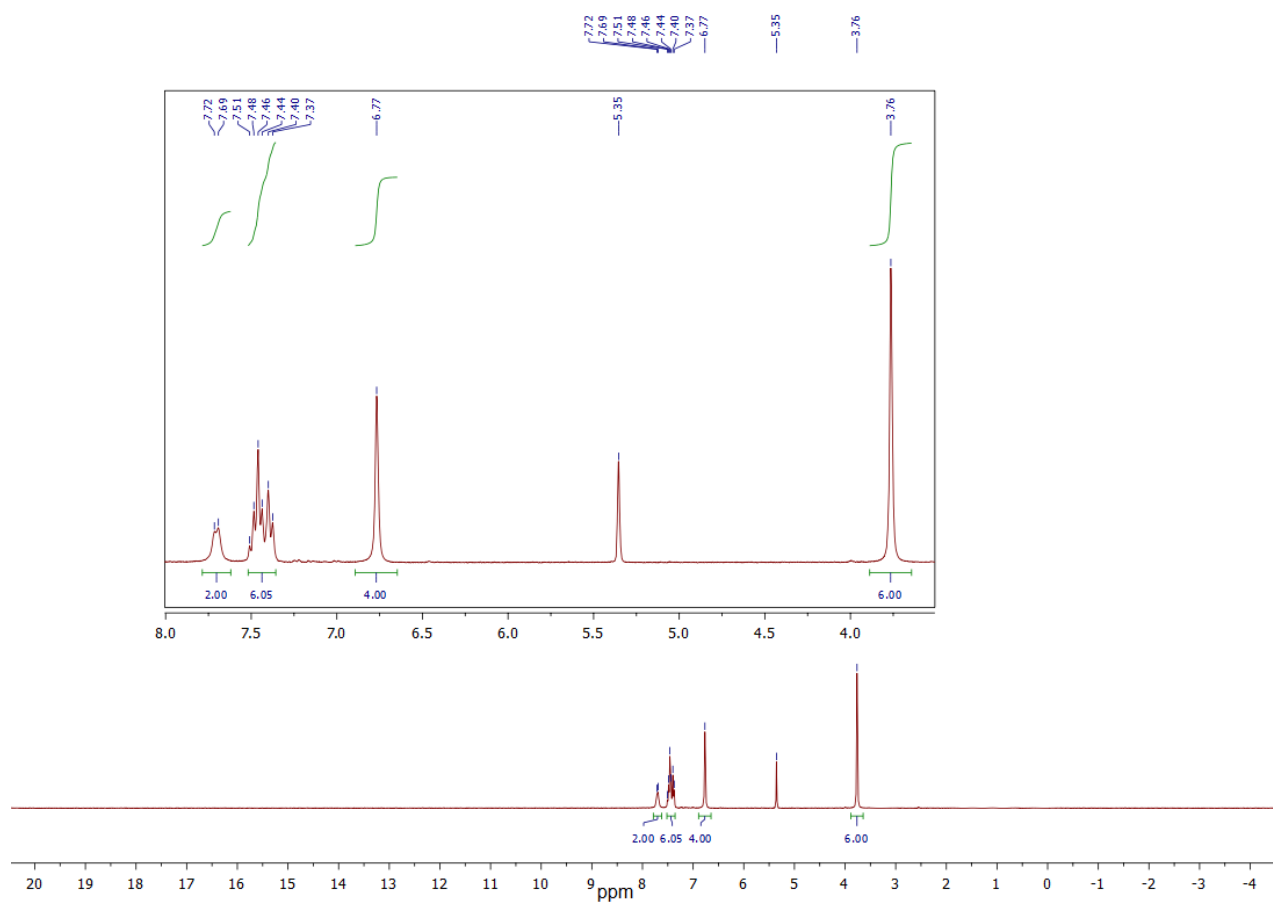

Figure S10. <sup>1</sup>H NMR spectrum of **4** in CD<sub>2</sub>Cl<sub>2</sub>.

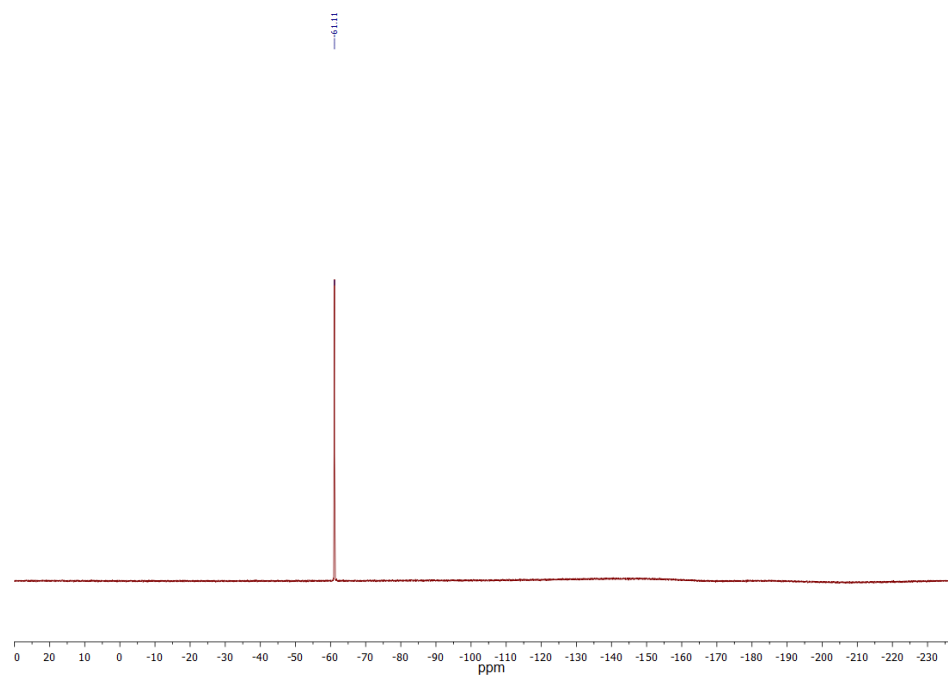

Figure S 11. <sup>19</sup>F NMR spectrum of **4** in CD<sub>2</sub>Cl<sub>2</sub>.



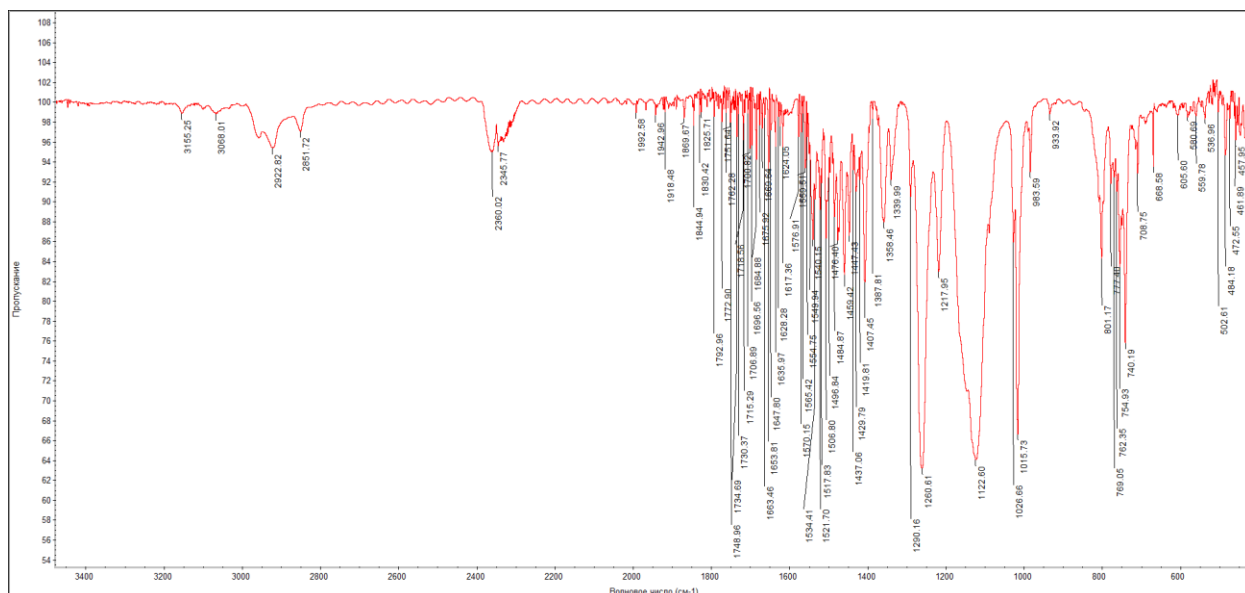

Figure S12. IR spectrum for complex 1 (KBr).

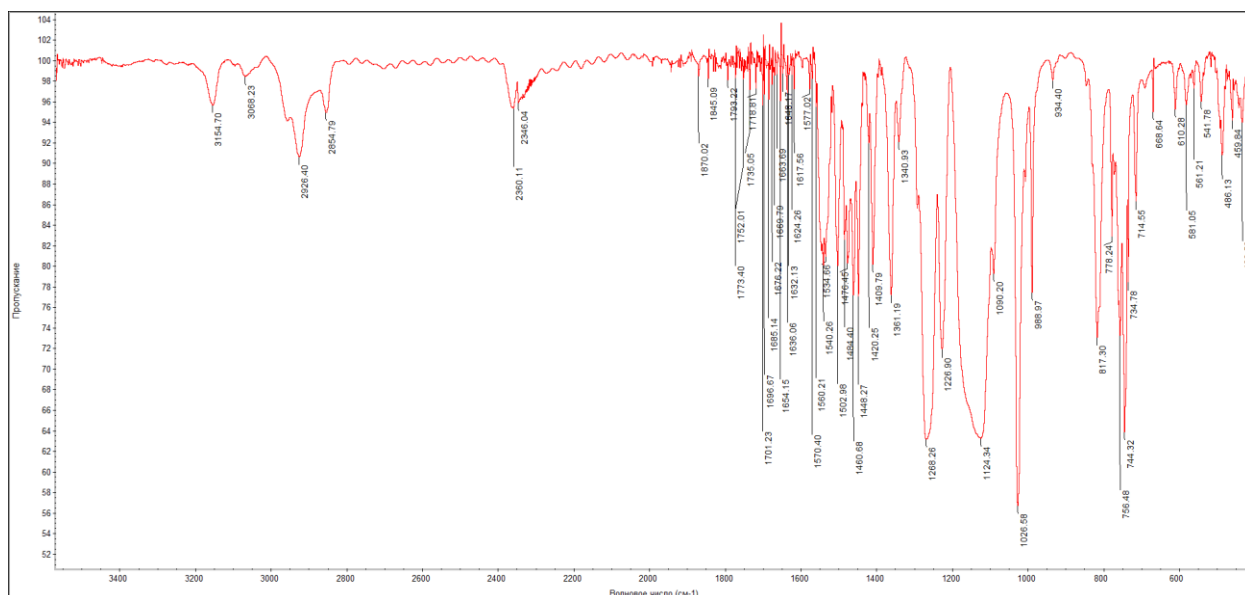

Figure S 13. IR spectrum for complex 2 (KBr).

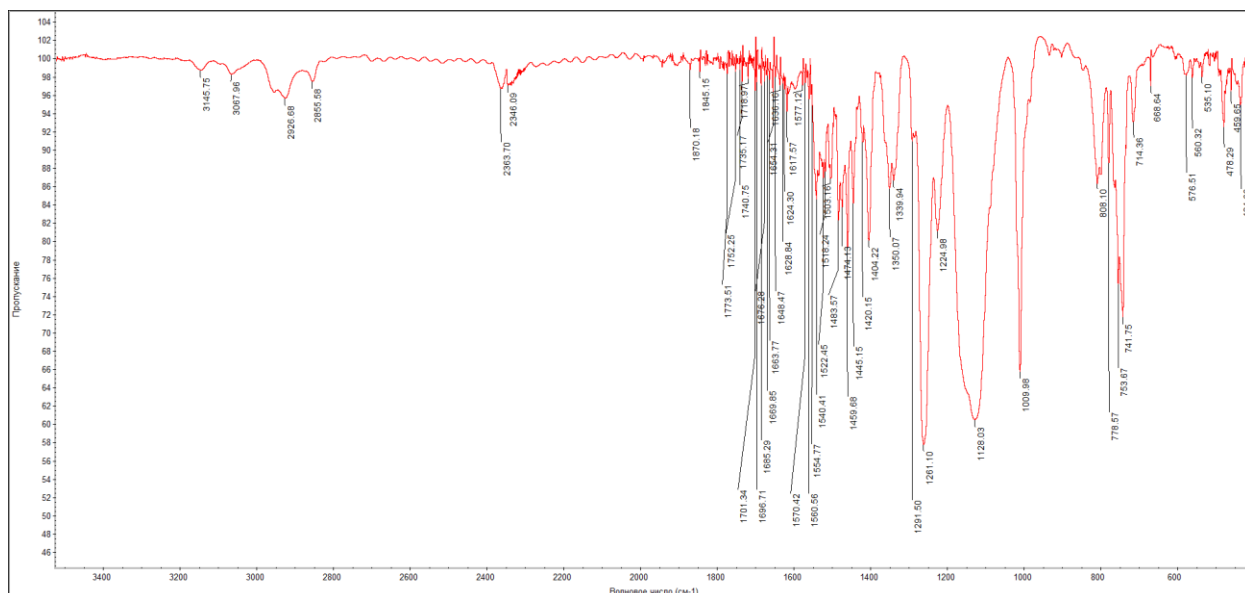

Figure S 14. IR spectrum for complex **3** (KBr).

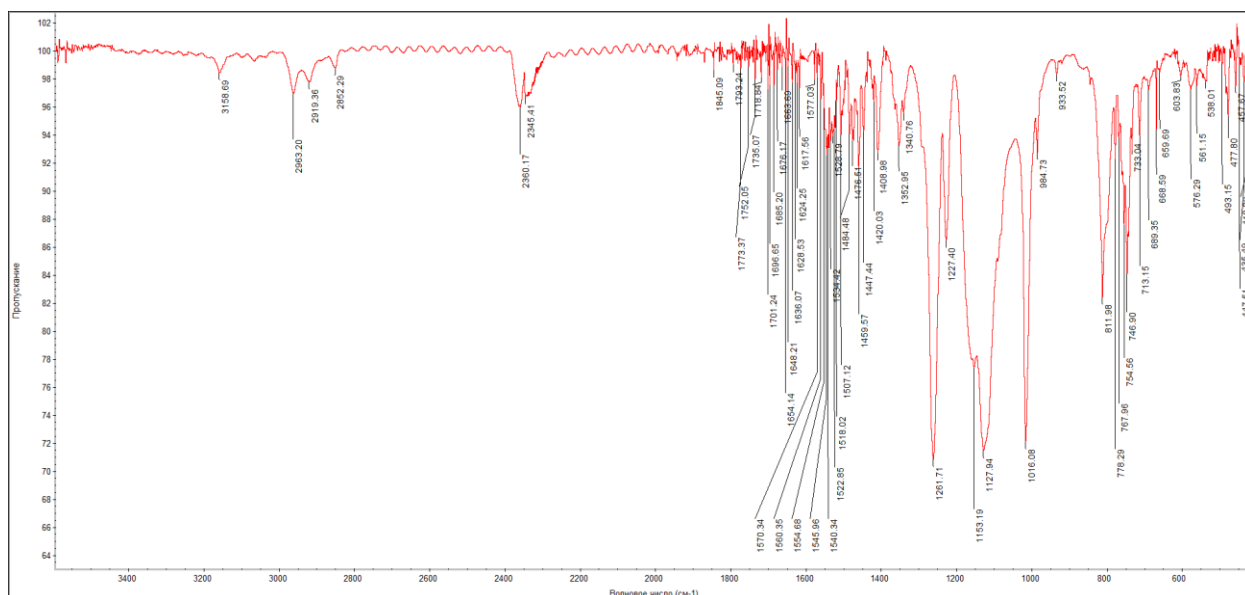

Figure S 15. IR spectrum for complex **4** (KBr).

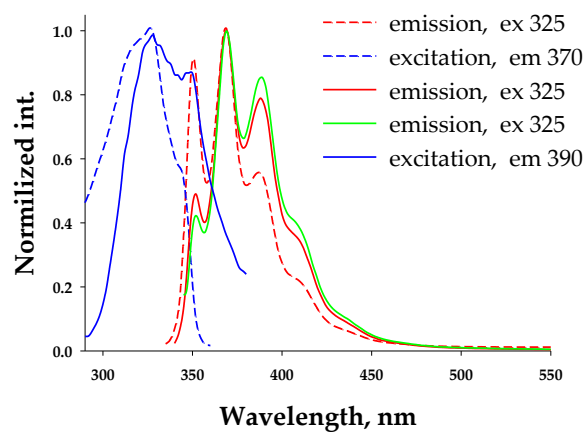

1

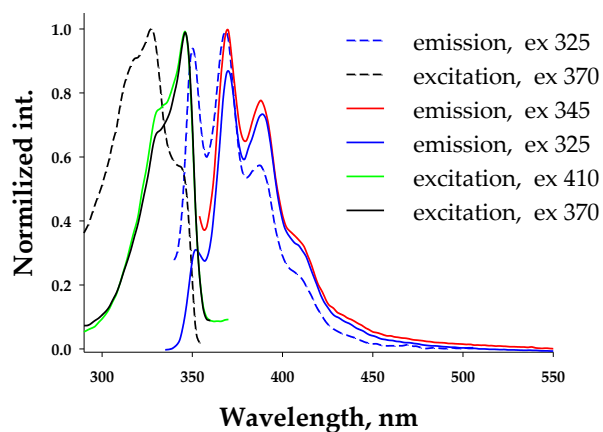

2

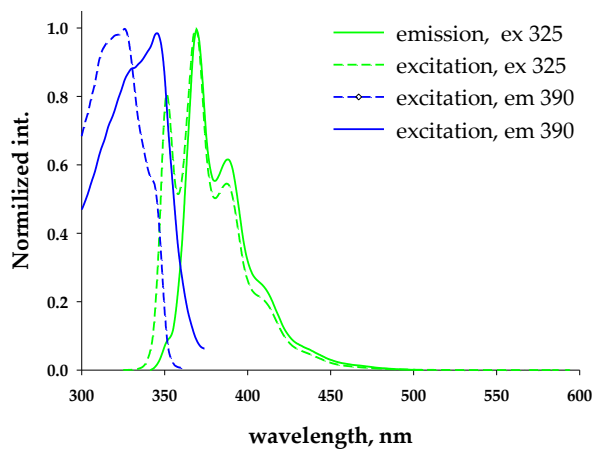

3

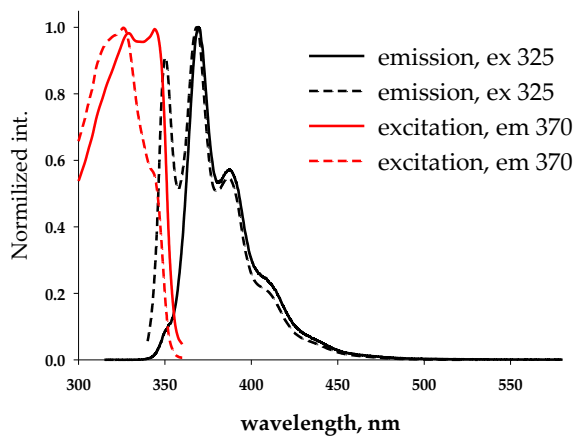

4

Figure S16. Emission and excitation spectra of complexes 1-4 at different concentrations (298 K):  $c=1\cdot 10^{-5}$  M (dashed lines) and  $c=1.2\cdot 10^{-2}$  M (solid lines).

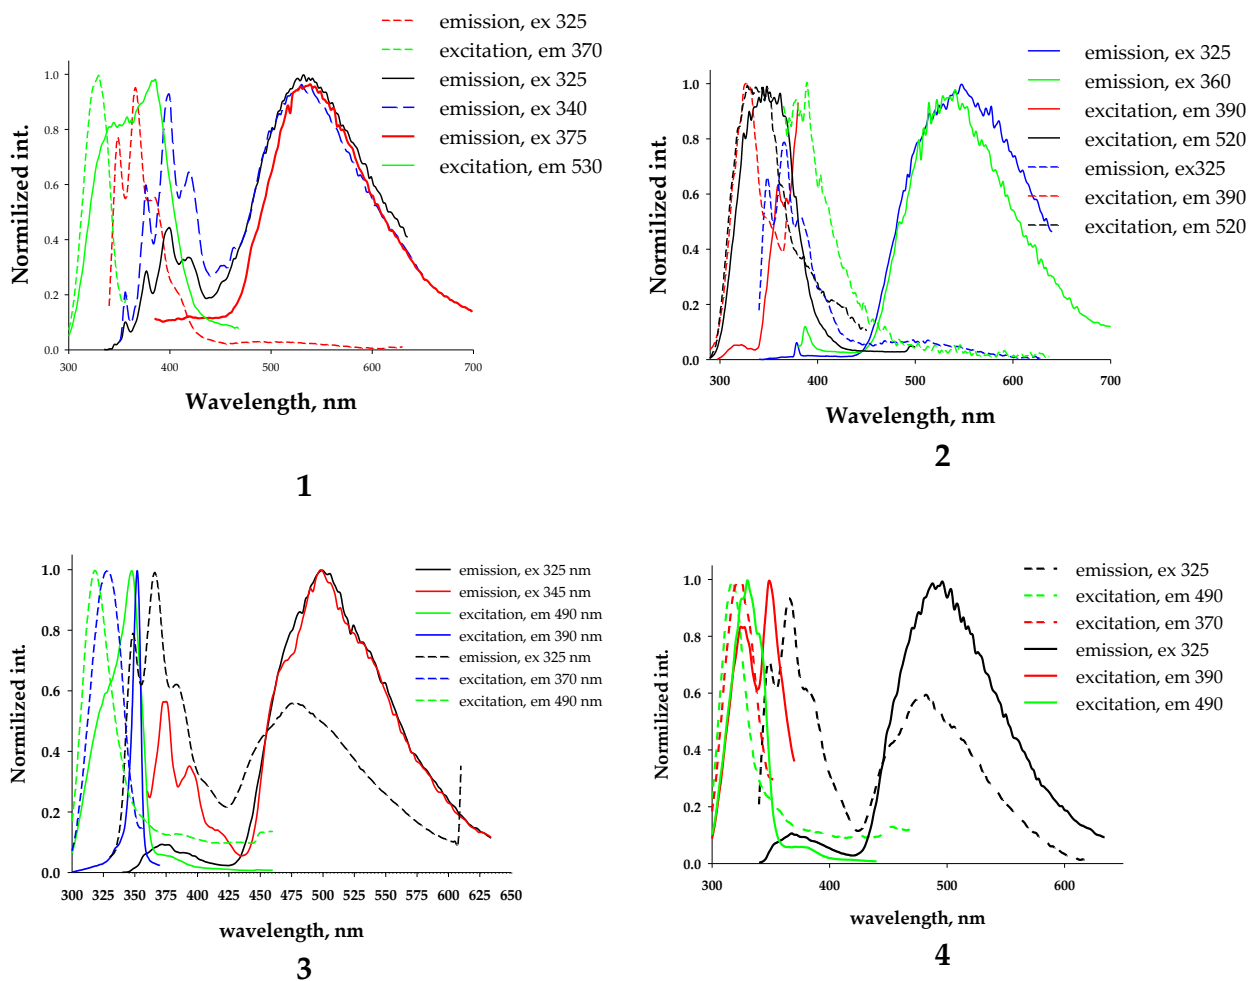

Figure S17. Emission and excitation spectra of complexes 1-4 at different concentrations (77 K, frozen solution):  $c=1 \cdot 10^{-5}$  M (dashed lines) and  $c=1.2 \cdot 10^{-2}$  M (solid lines).

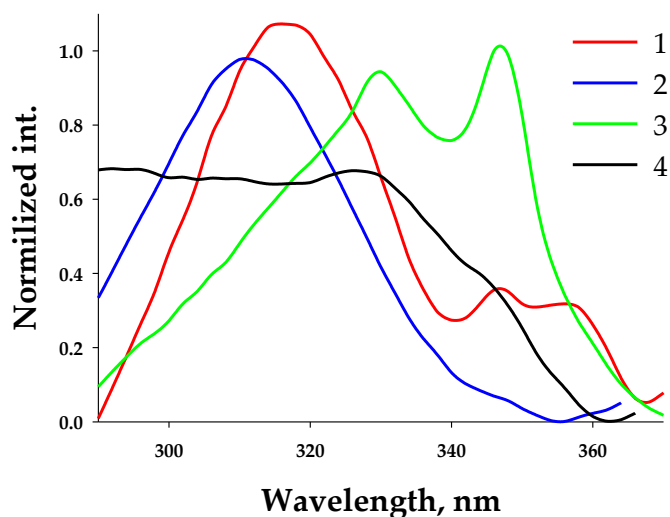

Figure S18. Excitation spectra of complexes,  $\lambda_{em}=390$  nm

Table S2. Characteristics of  $S_0 \rightarrow S_x$  vertical transitions and fragments contributions to the GS and ES electron density for complex **1**.

| state | E, cm <sup>-1</sup> | $\lambda$ , nm | f      | GS (hole) |    |    | ES (electron) |    |    |
|-------|---------------------|----------------|--------|-----------|----|----|---------------|----|----|
|       |                     |                |        | M         | L  | Pz | M             | L  | Pz |
| S1    | 31181.8             | 320.7          | 0.0018 | 80        | 8  | 11 | 9             | 90 | 1  |
| S2    | 31295.0             | 319.5          | 0.0017 | 79        | 9  | 12 | 5             | 94 | 1  |
| S3    | 31792.8             | 314.5          | 0.0067 | 80        | 8  | 12 | 13            | 86 | 1  |
| S4    | 32059.2             | 311.9          | 0.0081 | 80        | 9  | 11 | 9             | 89 | 1  |
| S5    | 32550.4             | 307.2          | 0.0024 | 82        | 4  | 13 | 23            | 75 | 2  |
| S6    | 32602.5             | 306.7          | 0.0097 | 84        | 3  | 13 | 19            | 80 | 2  |
| S7    | 32778.8             | 305.1          | 0.0181 | 83        | 4  | 14 | 23            | 74 | 3  |
| S8    | 33174.2             | 301.4          | 0.0082 | 84        | 3  | 13 | 32            | 65 | 3  |
| S9    | 33466.3             | 298.8          | 0.0058 | 82        | 5  | 13 | 50            | 46 | 4  |
| S10   | 33943.6             | 294.6          | 0.0020 | 83        | 5  | 12 | 61            | 34 | 5  |
| S11   | 34015.7             | 294.0          | 0.0016 | 83        | 5  | 13 | 59            | 36 | 5  |
| S12   | 34234.7             | 292.1          | 0.0012 | 83        | 3  | 13 | 58            | 37 | 5  |
| S13   | 34993.4             | 285.8          | 0.0003 | 85        | 4  | 11 | 78            | 15 | 7  |
| S14   | 35160.0             | 284.4          | 0.0003 | 86        | 3  | 11 | 72            | 22 | 6  |
| S15   | 35439.9             | 282.2          | 0.0003 | 85        | 4  | 10 | 79            | 14 | 7  |
| S16   | 36331.3             | 275.2          | 0.0164 | 88        | 2  | 9  | 75            | 18 | 7  |
| S17   | 36935.6             | 270.7          | 0.0348 | 94        | 1  | 4  | 8             | 91 | 1  |
| S18   | 37153.6             | 269.2          | 0.0116 | 94        | 2  | 4  | 4             | 96 | 0  |
| S19   | 37659.0             | 265.5          | 0.1158 | 70        | 27 | 3  | 13            | 86 | 1  |
| S20   | 37830.9             | 264.3          | 0.1555 | 66        | 31 | 2  | 12            | 87 | 1  |

Table S3 Characteristics of  $S_0 \rightarrow T_x$  vertical transitions and fragments contributions to the GS and ES electron density for complex **1**.

| state | E, cm <sup>-1</sup> | $\lambda$ , nm | GS (hole) |    |    | ES (electron) |    |    |
|-------|---------------------|----------------|-----------|----|----|---------------|----|----|
|       |                     |                | M         | L  | Pz | M             | L  | Pz |
| T1    | 29416.7             | 339.9          | 24        | 74 | 2  | 1             | 99 | 1  |
| T2    | 29529.2             | 338.6          | 22        | 75 | 2  | 1             | 99 | 0  |
| T3    | 29597.0             | 337.9          | 14        | 85 | 1  | 1             | 99 | 1  |
| T4    | 29609.6             | 337.7          | 16        | 83 | 1  | 0             | 99 | 1  |
| T5    | 30751.5             | 325.2          | 71        | 18 | 11 | 24            | 74 | 2  |
| T6    | 30946.9             | 323.1          | 68        | 22 | 10 | 7             | 92 | 1  |
| T7    | 31237.2             | 320.1          | 75        | 14 | 11 | 18            | 80 | 2  |
| T8    | 31467.6             | 317.8          | 75        | 14 | 11 | 14            | 84 | 2  |
| T9    | 31885.5             | 313.6          | 81        | 6  | 13 | 56            | 39 | 5  |
| T10   | 32179.5             | 310.8          | 78        | 9  | 13 | 53            | 42 | 5  |
| T11   | 32269.7             | 309.9          | 83        | 5  | 12 | 45            | 51 | 4  |
| T12   | 32518.6             | 307.5          | 81        | 7  | 12 | 54            | 41 | 5  |
| T13   | 32820.1             | 304.7          | 69        | 19 | 11 | 21            | 77 | 2  |
| T14   | 32942.8             | 303.6          | 54        | 38 | 8  | 29            | 68 | 3  |
| T15   | 33121.5             | 301.9          | 48        | 45 | 7  | 17            | 81 | 2  |
| T16   | 33336.1             | 300.0          | 33        | 61 | 6  | 17            | 81 | 2  |
| T17   | 33509.5             | 298.4          | 56        | 35 | 9  | 23            | 75 | 2  |

|     |         |       |    |    |    |    |    |   |
|-----|---------|-------|----|----|----|----|----|---|
| T18 | 33564.1 | 297.9 | 71 | 17 | 12 | 30 | 68 | 3 |
| T19 | 33943.6 | 294.6 | 85 | 4  | 11 | 72 | 22 | 6 |
| T20 | 34117.2 | 293.1 | 86 | 3  | 11 | 54 | 41 | 5 |

Table S4. Characteristics of  $S_0 \rightarrow S_x$  vertical transitions and fragments contributions to the GS and ES electron density for complex **2**.

| state | E, cm <sup>-1</sup> | $\lambda$ , nm | f      | GS (hole) |    |    | ES (electron) |    |    |
|-------|---------------------|----------------|--------|-----------|----|----|---------------|----|----|
|       |                     |                |        | M         | L  | Pz | M             | L  | Pz |
| S1    | 33206.7             | 301.1          | 0.0230 | 80        | 9  | 11 | 3             | 94 | 2  |
| S2    | 34002.8             | 294.1          | 0.0148 | 80        | 10 | 10 | 4             | 94 | 2  |
| S3    | 34972.8             | 285.9          | 0.0404 | 81        | 9  | 11 | 3             | 94 | 3  |
| S4    | 35766.9             | 279.6          | 0.0301 | 80        | 10 | 10 | 3             | 94 | 3  |
| S5    | 37100.0             | 269.5          | 0.0114 | 84        | 4  | 12 | 45            | 9  | 46 |
| S6    | 37872.6             | 264.0          | 0.0161 | 83        | 6  | 11 | 45            | 12 | 44 |
| S7    | 38758.4             | 258.0          | 0.0444 | 82        | 9  | 9  | 22            | 48 | 29 |
| S8    | 38853.7             | 257.4          | 0.0158 | 89        | 5  | 6  | 14            | 67 | 19 |
| S9    | 39090.3             | 255.8          | 0.5938 | 35        | 60 | 4  | 7             | 82 | 11 |
| S10   | 39254.5             | 254.7          | 0.1070 | 80        | 14 | 6  | 5             | 85 | 10 |
| S11   | 39581.9             | 252.6          | 0.0790 | 84        | 5  | 11 | 38            | 17 | 45 |
| S12   | 40563.4             | 246.5          | 0.0079 | 85        | 4  | 11 | 13            | 30 | 57 |
| S13   | 40753.1             | 245.4          | 0.1568 | 76        | 18 | 7  | 7             | 63 | 30 |
| S14   | 41031.1             | 243.7          | 0.1822 | 65        | 28 | 7  | 5             | 73 | 22 |
| S15   | 41209.7             | 242.7          | 0.0095 | 80        | 11 | 9  | 19            | 50 | 31 |
| S16   | 41261.5             | 242.4          | 0.0097 | 83        | 10 | 7  | 6             | 83 | 10 |
| S17   | 41571.2             | 240.6          | 0.1233 | 82        | 8  | 10 | 30            | 24 | 46 |
| S18   | 42047.1             | 237.8          | 0.0266 | 87        | 2  | 11 | 23            | 23 | 54 |
| S19   | 42197.3             | 237.0          | 0.0259 | 92        | 4  | 4  | 8             | 85 | 8  |
| S20   | 42767.1             | 233.8          | 0.0053 | 27        | 69 | 3  | 3             | 91 | 5  |

Table S5. Characteristics of  $S_0 \rightarrow T_x$  vertical transitions and fragments contributions to the GS and ES electron density for complex **2**.

| state | E, cm <sup>-1</sup> | $\lambda$ , nm | GS (hole) |    |    | ES (electron) |    |    |
|-------|---------------------|----------------|-----------|----|----|---------------|----|----|
|       |                     |                | M         | L  | Pz | M             | L  | Pz |
| T1    | 29345.9             | 340.8          | 17        | 81 | 2  | 1             | 98 | 1  |
| T2    | 29517.3             | 338.8          | 16        | 82 | 2  | 1             | 98 | 1  |
| T3    | 32789.1             | 305.0          | 62        | 30 | 8  | 4             | 94 | 2  |
| T4    | 32900.4             | 303.9          | 15        | 82 | 2  | 1             | 98 | 1  |
| T5    | 33444.2             | 299.0          | 71        | 20 | 10 | 5             | 92 | 3  |
| T6    | 34235.8             | 292.1          | 18        | 80 | 2  | 2             | 98 | 1  |
| T7    | 34981.7             | 285.9          | 55        | 37 | 8  | 5             | 91 | 4  |
| T8    | 35450.2             | 282.1          | 70        | 19 | 11 | 13            | 71 | 16 |
| T9    | 35834.5             | 279.1          | 73        | 7  | 20 | 27            | 28 | 44 |
| T10   | 36211.5             | 276.2          | 61        | 4  | 35 | 29            | 5  | 65 |
| T11   | 37125.4             | 269.4          | 44        | 3  | 53 | 8             | 7  | 85 |
| T12   | 37351.6             | 267.7          | 76        | 2  | 22 | 43            | 6  | 51 |

|     |         |       |    |   |    |    |    |    |
|-----|---------|-------|----|---|----|----|----|----|
| T13 | 37601.5 | 265.9 | 56 | 2 | 42 | 34 | 9  | 57 |
| T14 | 37798.7 | 264.6 | 73 | 3 | 24 | 32 | 15 | 53 |
| T15 | 37845.5 | 264.2 | 62 | 7 | 31 | 18 | 28 | 54 |
| T16 | 38286.2 | 261.2 | 65 | 7 | 29 | 15 | 49 | 36 |
| T17 | 38326.6 | 260.9 | 51 | 8 | 41 | 15 | 38 | 47 |
| T18 | 38601.9 | 259.1 | 78 | 3 | 19 | 10 | 67 | 23 |
| T19 | 38888.6 | 257.1 | 52 | 4 | 44 | 19 | 9  | 72 |
| T20 | 39096.2 | 255.8 | 62 | 5 | 34 | 17 | 12 | 71 |

**Table S6.** Characteristics of  $S_0 \rightarrow S_x$  vertical transitions and fragments contributions to the GS and ES electron density for complex **3**.

| state | E, cm <sup>-1</sup> | $\lambda$ , nm | f      | GS (hole) |    |    | ES (electron) |    |    |
|-------|---------------------|----------------|--------|-----------|----|----|---------------|----|----|
|       |                     |                |        | M         | L  | Pz | M             | L  | Pz |
| S1    | 39370.7             | 254.0          | 0.9648 | 1         | 99 | 0  | 0             | 99 | 0  |
| S2    | 39482.9             | 253.3          | 0.9498 | 1         | 99 | 0  | 0             | 99 | 0  |
| S3    | 40585.9             | 246.4          | 0.0030 | 66        | 7  | 27 | 87            | 6  | 7  |
| S4    | 40711.9             | 245.6          | 0.0019 | 66        | 7  | 27 | 87            | 6  | 7  |
| S5    | 41063.3             | 243.5          | 0.0232 | 66        | 8  | 27 | 86            | 7  | 7  |
| S6    | 41282.8             | 242.2          | 0.0011 | 66        | 3  | 31 | 87            | 6  | 7  |
| S7    | 42119.3             | 237.4          | 0.1726 | 3         | 93 | 4  | 2             | 98 | 0  |
| S8    | 42158.1             | 237.2          | 0.1183 | 4         | 93 | 3  | 4             | 96 | 1  |
| S9    | 42917.7             | 233.0          | 0.0014 | 64        | 19 | 17 | 67            | 27 | 6  |
| S10   | 43088.5             | 232.1          | 0.1154 | 10        | 85 | 5  | 10            | 89 | 1  |
| S11   | 43195.7             | 231.5          | 0.1163 | 13        | 82 | 5  | 13            | 85 | 2  |
| S12   | 43625.4             | 229.2          | 0.1383 | 34        | 57 | 9  | 7             | 92 | 1  |
| S13   | 43842.6             | 228.1          | 0.0578 | 53        | 31 | 16 | 47            | 48 | 4  |
| S14   | 43903.6             | 227.8          | 0.0354 | 34        | 56 | 9  | 26            | 72 | 3  |
| S15   | 43936.0             | 227.6          | 0.0416 | 62        | 21 | 17 | 66            | 28 | 6  |
| S16   | 44303.4             | 225.7          | 0.0938 | 25        | 65 | 11 | 4             | 95 | 1  |
| S17   | 44467.2             | 224.9          | 0.0349 | 51        | 28 | 21 | 12            | 86 | 2  |
| S18   | 44591.6             | 224.3          | 0.0526 | 36        | 51 | 14 | 2             | 97 | 1  |
| S19   | 44885.2             | 222.8          | 0.0225 | 51        | 28 | 21 | 6             | 93 | 1  |
| S20   | 45361.1             | 220.5          | 0.0015 | 75        | 2  | 23 | 86            | 6  | 8  |

**Table S7.** Characteristics of  $S_0 \rightarrow T_x$  vertical transitions and fragments contributions to the GS and ES electron density for complex **3**.

| state | E, cm <sup>-1</sup> | $\lambda$ , nm | GS (hole) |     |    | ES (electron) |     |    |
|-------|---------------------|----------------|-----------|-----|----|---------------|-----|----|
|       |                     |                | M         | L   | Pz | M             | L   | Pz |
| T1    | 30152.8             | 331.6          | 1         | 99  | 0  | 1             | 99  | 0  |
| T2    | 30263.9             | 330.4          | 1         | 99  | 0  | 1             | 99  | 1  |
| T3    | 30390.7             | 329.0          | 1         | 99  | 0  | 1             | 99  | 1  |
| T4    | 30457.1             | 328.3          | 1         | 98  | 1  | 1             | 99  | 1  |
| T5    | 33173.1             | 301.4          | 0         | 100 | 0  | 0             | 100 | 0  |
| T6    | 33215.4             | 301.1          | 0         | 99  | 1  | 0             | 100 | 0  |
| T7    | 34688.8             | 288.3          | 1         | 99  | 0  | 0             | 99  | 0  |
| T8    | 34711.2             | 288.1          | 0         | 100 | 0  | 0             | 100 | 0  |
| T9    | 38776.7             | 257.9          | 66        | 7   | 26 | 87            | 6   | 8  |

|     |         |       |    |    |    |    |    |    |
|-----|---------|-------|----|----|----|----|----|----|
| T10 | 38935.7 | 256.8 | 67 | 7  | 27 | 87 | 6  | 8  |
| T11 | 39218.3 | 255.0 | 67 | 7  | 26 | 86 | 6  | 8  |
| T12 | 39552.5 | 252.8 | 62 | 9  | 29 | 81 | 11 | 8  |
| T13 | 39674.2 | 252.1 | 6  | 74 | 20 | 9  | 73 | 18 |
| T14 | 39691.6 | 251.9 | 3  | 94 | 4  | 4  | 93 | 3  |
| T15 | 39736.4 | 251.7 | 5  | 18 | 77 | 7  | 17 | 77 |
| T16 | 39809.7 | 251.2 | 5  | 6  | 89 | 8  | 4  | 88 |
| T17 | 39822.1 | 251.1 | 3  | 5  | 92 | 5  | 3  | 92 |
| T18 | 39919.7 | 250.5 | 2  | 71 | 27 | 4  | 69 | 27 |
| T19 | 39929.7 | 250.4 | 2  | 91 | 7  | 3  | 91 | 6  |
| T20 | 39997.6 | 250.0 | 2  | 32 | 66 | 4  | 29 | 67 |

Table S8. Characteristics of  $S_0 \rightarrow S_x$  vertical transitions and fragments contributions to the GS and ES electron density for complex 4.

| state | E, cm <sup>-1</sup> | λ, nm | f      | M  | GS (hole) |    |    | ES (electron) |    |  |
|-------|---------------------|-------|--------|----|-----------|----|----|---------------|----|--|
|       |                     |       |        |    | L         | Pz | M  | L             | Pz |  |
| S1    | 39578.2             | 252.7 | 0.8860 | 1  | 98        | 1  | 1  | 99            | 0  |  |
| S2    | 42303.3             | 236.4 | 0.1381 | 2  | 97        | 1  | 1  | 99            | 1  |  |
| S3    | 43238.2             | 231.3 | 0.1100 | 8  | 90        | 2  | 3  | 96            | 1  |  |
| S4    | 43611.7             | 229.3 | 0.1485 | 14 | 78        | 7  | 2  | 98            | 0  |  |
| S5    | 44788.6             | 223.3 | 0.0432 | 55 | 25        | 20 | 43 | 50            | 7  |  |
| S6    | 44839.4             | 223.0 | 0.0256 | 55 | 25        | 20 | 33 | 61            | 6  |  |
| S7    | 46196.2             | 216.5 | 0.0070 | 61 | 6         | 33 | 64 | 20            | 16 |  |
| S8    | 46237.2             | 216.3 | 0.0111 | 52 | 28        | 20 | 14 | 83            | 3  |  |
| S9    | 47175.6             | 212.0 | 0.0022 | 69 | 9         | 22 | 77 | 7             | 17 |  |
| S10   | 48333.5             | 206.9 | 0.1330 | 62 | 5         | 33 | 40 | 8             | 52 |  |
| S11   | 48746.4             | 205.1 | 0.0023 | 59 | 10        | 30 | 6  | 89            | 5  |  |
| S12   | 49113.7             | 203.6 | 0.0151 | 56 | 13        | 31 | 35 | 17            | 49 |  |
| S13   | 49224.3             | 203.2 | 0.0437 | 55 | 11        | 34 | 23 | 16            | 60 |  |
| S14   | 49494.2             | 202.0 | 0.8103 | 29 | 59        | 13 | 23 | 66            | 11 |  |
| S15   | 49762.1             | 201.0 | 0.0552 | 48 | 22        | 29 | 20 | 44            | 37 |  |
| S16   | 49813.4             | 200.7 | 0.1236 | 46 | 29        | 24 | 8  | 71            | 21 |  |
| S17   | 49917.5             | 200.3 | 0.0358 | 55 | 9         | 37 | 21 | 20            | 60 |  |
| S18   | 50679.8             | 197.3 | 0.2763 | 52 | 18        | 30 | 25 | 66            | 9  |  |
| S19   | 50923.5             | 196.4 | 0.0798 | 58 | 12        | 30 | 55 | 21            | 24 |  |
| S20   | 51126.7             | 195.6 | 0.1337 | 62 | 12        | 26 | 62 | 11            | 27 |  |

Table S9. Characteristics of  $S_0 \rightarrow T_x$  vertical transitions and fragments contributions to the GS and ES electron density for complex 4.

| state | E, cm <sup>-1</sup> | $\lambda$ , nm | GS (hole) |     |    | ES (electron) |     |    |
|-------|---------------------|----------------|-----------|-----|----|---------------|-----|----|
|       |                     |                | M         | L   | Pz | M             | L   | Pz |
| T1    | 30254.8             | 330.5          | 1         | 98  | 1  | 1             | 99  | 0  |
| T2    | 30402.0             | 328.9          | 1         | 98  | 1  | 1             | 98  | 1  |
| T3    | 33123.0             | 301.9          | 0         | 100 | 0  | 0             | 99  | 0  |
| T4    | 34455.7             | 290.2          | 0         | 100 | 0  | 0             | 100 | 0  |



|     |         |       |    |    |    |    |    |    |
|-----|---------|-------|----|----|----|----|----|----|
| T5  | 39351.8 | 254.1 | 3  | 0  | 97 | 5  | 1  | 94 |
| T6  | 39450.6 | 253.5 | 2  | 0  | 98 | 5  | 0  | 95 |
| T7  | 39695.9 | 251.9 | 3  | 36 | 62 | 4  | 35 | 61 |
| T8  | 39722.1 | 251.7 | 4  | 14 | 82 | 5  | 14 | 81 |
| T9  | 39845.6 | 251.0 | 3  | 55 | 42 | 4  | 55 | 42 |
| T10 | 39993.6 | 250.0 | 3  | 95 | 3  | 2  | 95 | 2  |
| T11 | 41064.1 | 243.5 | 59 | 11 | 30 | 69 | 12 | 19 |
| T12 | 41501.5 | 241.0 | 17 | 2  | 81 | 20 | 2  | 79 |
| T13 | 41768.6 | 239.4 | 6  | 28 | 66 | 5  | 30 | 65 |
| T14 | 41926.1 | 238.5 | 12 | 50 | 38 | 13 | 51 | 36 |
| T15 | 41964.7 | 238.3 | 10 | 80 | 10 | 10 | 82 | 8  |
| T16 | 42196.0 | 237.0 | 16 | 15 | 68 | 17 | 15 | 67 |
| T17 | 42318.6 | 236.3 | 12 | 24 | 63 | 14 | 24 | 62 |
| T18 | 42451.9 | 235.6 | 8  | 77 | 15 | 9  | 78 | 13 |
| T19 | 42648.2 | 234.5 | 14 | 45 | 41 | 15 | 46 | 39 |
| T20 | 42654.9 | 234.4 | 18 | 58 | 24 | 20 | 62 | 19 |

Table S10. XYZ coordinates of all computes species.

syn-L, GS, E=-837.81644508; H=-837.52448731; G=-837.58346169

|   |              |              |              |
|---|--------------|--------------|--------------|
| 7 | 7.349144000  | 10.808746000 | 9.310244000  |
| 7 | 6.849280000  | 13.767830000 | 7.522212000  |
| 7 | 9.178415000  | 11.982886000 | 8.768347000  |
| 6 | 4.679928000  | 13.946866000 | 4.060186000  |
| 1 | 4.107915000  | 13.934395000 | 3.139796000  |
| 7 | 6.575617000  | 11.823519000 | 6.443139000  |
| 6 | 4.859723000  | 15.168006000 | 4.734411000  |
| 1 | 4.426349000  | 16.069365000 | 4.317149000  |
| 6 | 5.214452000  | 12.770725000 | 4.546357000  |
| 1 | 5.077941000  | 11.828070000 | 4.029812000  |
| 6 | 6.108039000  | 14.053535000 | 6.398113000  |
| 6 | 8.396687000  | 10.421152000 | 10.125944000 |
| 6 | 7.093567000  | 12.423874000 | 7.482595000  |
| 6 | 9.548454000  | 11.149545000 | 9.799121000  |
| 6 | 5.941268000  | 12.829389000 | 5.736780000  |
| 6 | 9.633884000  | 9.288581000  | 11.810537000 |
| 1 | 9.697557000  | 8.560285000  | 12.610385000 |
| 6 | 10.781745000 | 10.025883000 | 11.467678000 |
| 1 | 11.703163000 | 9.849884000  | 12.010153000 |
| 6 | 7.856894000  | 11.727917000 | 8.531428000  |
| 6 | 7.209955000  | 14.716822000 | 8.557922000  |
| 1 | 7.949910000  | 15.426113000 | 8.185592000  |
| 1 | 7.623163000  | 14.182572000 | 9.410669000  |
| 1 | 6.321093000  | 15.256703000 | 8.883173000  |
| 6 | 8.436046000  | 9.473201000  | 11.150090000 |
| 1 | 7.550926000  | 8.905292000  | 11.411202000 |
| 6 | 10.762109000 | 10.967794000 | 10.458076000 |
| 1 | 11.646091000 | 11.536273000 | 10.195854000 |
| 6 | 10.058800000 | 12.898810000 | 8.068290000  |
| 1 | 10.338852000 | 13.728552000 | 8.718303000  |
| 1 | 9.552376000  | 13.286735000 | 7.187046000  |
| 1 | 10.955412000 | 12.369054000 | 7.748124000  |
| 6 | 5.575133000  | 15.245708000 | 5.913245000  |
| 1 | 5.712690000  | 16.187330000 | 6.430822000  |

syn-L, S1, E=-837.66218379; H=-837.37356276; G=-837.43212155

|   |              |              |              |
|---|--------------|--------------|--------------|
| 7 | 7.538361000  | 10.531977000 | 8.961620000  |
| 7 | 7.126264000  | 13.837101000 | 7.304224000  |
| 7 | 9.089841000  | 12.212743000 | 9.049081000  |
| 6 | 4.374431000  | 13.820329000 | 4.270279000  |
| 1 | 3.641376000  | 13.777413000 | 3.473040000  |
| 7 | 6.168574000  | 11.823816000 | 6.779504000  |
| 6 | 4.938124000  | 15.073370000 | 4.601799000  |
| 1 | 4.624483000  | 15.952278000 | 4.050655000  |
| 6 | 4.729041000  | 12.666197000 | 4.929072000  |
| 1 | 4.289221000  | 11.707100000 | 4.684776000  |
| 6 | 6.260066000  | 14.044674000 | 6.269428000  |
| 6 | 8.464526000  | 10.229102000 | 9.870135000  |
| 6 | 7.081993000  | 12.460938000 | 7.584933000  |
| 6 | 9.462529000  | 11.256083000 | 9.948159000  |
| 6 | 5.687979000  | 12.764615000 | 5.967880000  |
| 6 | 9.688907000  | 8.998865000  | 11.515779000 |
| 1 | 9.814941000  | 8.131089000  | 12.153007000 |
| 6 | 10.669096000 | 10.016256000 | 11.558861000 |
| 1 | 11.517878000 | 9.899125000  | 12.222615000 |
| 6 | 7.890833000  | 11.765512000 | 8.469883000  |
| 6 | 7.509814000  | 14.902808000 | 8.216836000  |
| 1 | 8.372080000  | 15.455882000 | 7.844259000  |
| 1 | 7.743548000  | 14.481139000 | 9.191503000  |
| 1 | 6.668941000  | 15.588400000 | 8.331980000  |
| 6 | 8.589755000  | 9.082594000  | 10.693499000 |
| 1 | 7.842744000  | 8.299510000  | 10.652582000 |
| 6 | 10.574253000 | 11.157675000 | 10.773349000 |
| 1 | 11.326065000 | 11.935956000 | 10.813178000 |
| 6 | 10.035755000 | 13.165471000 | 8.491107000  |
| 1 | 10.149750000 | 14.035045000 | 9.138810000  |
| 1 | 9.695713000  | 13.486497000 | 7.510080000  |
| 1 | 11.004621000 | 12.677480000 | 8.374389000  |
| 6 | 5.883949000  | 15.206432000 | 5.610179000  |
| 1 | 6.317123000  | 16.167942000 | 5.856313000  |

syn-L, T1, E=-837.69952573; H= -837.41194060; G=-837.47065285

|   |              |              |              |
|---|--------------|--------------|--------------|
| 7 | 7.533613000  | 10.542557000 | 8.976955000  |
| 7 | 7.132208000  | 13.849013000 | 7.312481000  |
| 7 | 9.091154000  | 12.224290000 | 9.054314000  |
| 6 | 4.380240000  | 13.818738000 | 4.259134000  |
| 1 | 3.649137000  | 13.767435000 | 3.460961000  |
| 7 | 6.158600000  | 11.834731000 | 6.792505000  |
| 6 | 4.948063000  | 15.064245000 | 4.580719000  |
| 1 | 4.643804000  | 15.941891000 | 4.022195000  |
| 6 | 4.731112000  | 12.671833000 | 4.937702000  |
| 1 | 4.290141000  | 11.710321000 | 4.704565000  |
| 6 | 6.261248000  | 14.051993000 | 6.268730000  |
| 6 | 8.470299000  | 10.239723000 | 9.884490000  |
| 6 | 7.074928000  | 12.480984000 | 7.608449000  |
| 6 | 9.466978000  | 11.255768000 | 9.952733000  |
| 6 | 5.689003000  | 12.780148000 | 5.971357000  |
| 6 | 9.691105000  | 8.992514000  | 11.519349000 |
| 1 | 9.810486000  | 8.122263000  | 12.153911000 |
| 6 | 10.673491000 | 9.997907000  | 11.552641000 |
| 1 | 11.527451000 | 9.878284000  | 12.209335000 |
| 6 | 7.896918000  | 11.779106000 | 8.474601000  |
| 6 | 7.479034000  | 14.913670000 | 8.240502000  |
| 1 | 8.264893000  | 15.549453000 | 7.832250000  |
| 1 | 7.820045000  | 14.483619000 | 9.178212000  |
| 1 | 6.594993000  | 15.520855000 | 8.442875000  |
| 6 | 8.588405000  | 9.091825000  | 10.698861000 |
| 1 | 7.832724000  | 8.316809000  | 10.659051000 |
| 6 | 10.579528000 | 11.145982000 | 10.765775000 |
| 1 | 11.340734000 | 11.915176000 | 10.801518000 |
| 6 | 10.046640000 | 13.152130000 | 8.471216000  |
| 1 | 10.221212000 | 14.003757000 | 9.129287000  |
| 1 | 9.671875000  | 13.510165000 | 7.516392000  |
| 1 | 10.991657000 | 12.635440000 | 8.297040000  |
| 6 | 5.894996000  | 15.202228000 | 5.597054000  |
| 1 | 6.325861000  | 16.166557000 | 5.835633000  |

anti-L, GS, E=-837.81863945 ; H=-837.52662550; G=-837.58510934

|   |              |              |              |
|---|--------------|--------------|--------------|
| 7 | 8.833438000  | 12.344629000 | 9.246921000  |
| 7 | 6.642738000  | 13.673219000 | 7.600808000  |
| 7 | 7.848881000  | 10.408061000 | 8.696984000  |
| 6 | 5.205005000  | 14.085540000 | 3.792843000  |
| 1 | 4.846492000  | 14.141127000 | 2.771687000  |
| 7 | 7.046224000  | 11.960710000 | 6.212703000  |
| 6 | 4.953034000  | 15.161233000 | 4.663683000  |
| 1 | 4.407620000  | 16.021771000 | 4.294266000  |
| 6 | 5.896093000  | 12.966735000 | 4.211873000  |
| 1 | 6.091435000  | 12.136920000 | 3.542990000  |
| 6 | 6.085551000  | 14.015974000 | 6.389661000  |
| 6 | 9.353249000  | 11.335355000 | 10.031620000 |
| 6 | 7.204658000  | 12.441413000 | 7.422070000  |
| 6 | 8.750490000  | 10.115532000 | 9.695433000  |
| 6 | 6.341817000  | 12.935209000 | 5.534745000  |
| 6 | 10.665627000 | 10.205734000 | 11.660025000 |
| 1 | 11.419939000 | 10.210451000 | 12.437965000 |
| 6 | 10.050744000 | 8.989088000  | 11.312676000 |
| 1 | 10.345313000 | 8.083634000  | 11.830086000 |
| 6 | 7.956589000  | 11.751126000 | 8.473983000  |
| 6 | 6.595591000  | 14.490676000 | 8.799781000  |
| 1 | 6.810350000  | 13.873471000 | 9.666581000  |
| 1 | 5.597802000  | 14.916844000 | 8.897459000  |
| 1 | 7.331857000  | 15.292916000 | 8.743230000  |
| 6 | 10.328188000 | 11.386190000 | 11.030037000 |
| 1 | 10.799261000 | 12.325691000 | 11.293882000 |
| 6 | 9.085141000  | 8.919508000  | 10.327856000 |
| 1 | 8.618953000  | 7.979433000  | 10.059246000 |
| 6 | 6.963239000  | 9.446255000  | 8.065333000  |
| 1 | 7.493994000  | 8.883822000  | 7.296780000  |
| 1 | 6.127610000  | 9.967475000  | 7.608294000  |
| 1 | 6.587960000  | 8.762008000  | 8.825155000  |
| 6 | 5.386458000  | 15.148040000 | 5.974724000  |
| 1 | 5.194413000  | 15.979131000 | 6.642343000  |

anti-L, S1, E=-837.67147531; H=-837.38320243; G=-837.44267159

|   |              |              |              |
|---|--------------|--------------|--------------|
| 7 | 8.383604000  | 12.320500000 | 9.592346000  |
| 7 | 6.761129000  | 13.778211000 | 7.582194000  |
| 7 | 7.975413000  | 10.326047000 | 8.558764000  |
| 6 | 4.814719000  | 13.983781000 | 3.992833000  |
| 1 | 4.295926000  | 13.998521000 | 3.041310000  |
| 7 | 6.465413000  | 11.814134000 | 6.456015000  |
| 6 | 5.008989000  | 15.207938000 | 4.674943000  |
| 1 | 4.639016000  | 16.122153000 | 4.225712000  |
| 6 | 5.264484000  | 12.787537000 | 4.502741000  |
| 1 | 5.115795000  | 11.849777000 | 3.981861000  |
| 6 | 6.117738000  | 14.063834000 | 6.424696000  |
| 6 | 8.998921000  | 11.345312000 | 10.259221000 |
| 6 | 6.998154000  | 12.387833000 | 7.584279000  |
| 6 | 8.760720000  | 10.076439000 | 9.633560000  |
| 6 | 5.940132000  | 12.811451000 | 5.746456000  |
| 6 | 10.318424000 | 10.221425000 | 11.905310000 |
| 1 | 10.940189000 | 10.232692000 | 12.793087000 |
| 6 | 10.061368000 | 8.979876000  | 11.276953000 |
| 1 | 10.489336000 | 8.079727000  | 11.702302000 |
| 6 | 7.751172000  | 11.718541000 | 8.533121000  |
| 6 | 7.068245000  | 14.782485000 | 8.583617000  |
| 1 | 7.225468000  | 14.302391000 | 9.541519000  |
| 1 | 6.228535000  | 15.475257000 | 8.647529000  |
| 1 | 7.970475000  | 15.334660000 | 8.311572000  |
| 6 | 9.804694000  | 11.402676000 | 11.421463000 |
| 1 | 9.999656000  | 12.353067000 | 11.902816000 |
| 6 | 9.281810000  | 8.885484000  | 10.134557000 |
| 1 | 9.092903000  | 7.933749000  | 9.654382000  |
| 6 | 7.493448000  | 9.273953000  | 7.683009000  |
| 1 | 8.333641000  | 8.817149000  | 7.155144000  |
| 1 | 6.803514000  | 9.696750000  | 6.963054000  |
| 1 | 6.990815000  | 8.511005000  | 8.280658000  |
| 6 | 5.660298000  | 15.269576000 | 5.897134000  |
| 1 | 5.811612000  | 16.210991000 | 6.409566000  |

anti-L, T1, E=-837.70595012; H= -837.41887196; G= -837.47893438

|   |              |              |              |
|---|--------------|--------------|--------------|
| 7 | 8.378905000  | 12.315732000 | 9.636897000  |
| 7 | 6.765158000  | 13.787241000 | 7.589783000  |
| 7 | 7.937190000  | 10.333144000 | 8.582670000  |
| 6 | 4.911304000  | 13.963824000 | 3.936008000  |
| 1 | 4.426037000  | 13.967268000 | 2.967131000  |
| 7 | 6.552380000  | 11.826179000 | 6.432410000  |
| 6 | 5.042358000  | 15.180792000 | 4.634475000  |
| 1 | 4.656532000  | 16.088594000 | 4.185537000  |
| 6 | 5.384741000  | 12.781162000 | 4.456395000  |
| 1 | 5.287014000  | 11.842199000 | 3.925650000  |
| 6 | 6.135870000  | 14.064128000 | 6.413282000  |
| 6 | 9.011531000  | 11.328089000 | 10.268857000 |
| 6 | 7.040212000  | 12.410859000 | 7.589530000  |
| 6 | 8.760074000  | 10.069355000 | 9.637882000  |
| 6 | 6.015665000  | 12.818565000 | 5.722949000  |
| 6 | 10.366700000 | 10.207389000 | 11.890989000 |
| 1 | 11.001173000 | 10.218098000 | 12.769362000 |
| 6 | 10.108757000 | 8.977771000  | 11.252610000 |
| 1 | 10.551934000 | 8.074045000  | 11.654187000 |
| 6 | 7.713545000  | 11.719114000 | 8.577806000  |
| 6 | 7.022727000  | 14.785732000 | 8.608291000  |
| 1 | 7.180944000  | 14.298009000 | 9.562665000  |
| 1 | 6.159979000  | 15.449195000 | 8.674146000  |
| 1 | 7.909337000  | 15.373044000 | 8.360686000  |
| 6 | 9.832162000  | 11.384070000 | 11.420609000 |
| 1 | 10.022082000 | 12.334552000 | 11.904008000 |
| 6 | 9.303937000  | 8.888076000  | 10.120360000 |
| 1 | 9.123353000  | 7.934295000  | 9.641778000  |
| 6 | 7.328803000  | 9.320735000  | 7.741911000  |
| 1 | 7.753543000  | 9.331092000  | 6.739600000  |
| 1 | 6.256462000  | 9.486223000  | 7.671038000  |
| 1 | 7.506875000  | 8.349675000  | 8.198781000  |
| 6 | 5.657988000  | 15.251920000 | 5.881945000  |
| 1 | 5.760484000  | 16.194755000 | 6.403495000  |

Cu4Pz4L2 (1), E=-11920.71487534; H=-11919.77801939;  
G=-11919.97052341

|    |              |              |              |
|----|--------------|--------------|--------------|
| 29 | 7.654210000  | 10.085871000 | 10.367244000 |
| 29 | 6.735926000  | 7.506534000  | 12.292535000 |
| 29 | 9.763345000  | 7.638037000  | 11.186492000 |
| 29 | 8.786499000  | 9.882360000  | 13.447015000 |
| 9  | 4.170439000  | 13.258539000 | 10.708652000 |
| 9  | 4.571769000  | 4.503826000  | 9.398489000  |
| 9  | 8.621500000  | 9.705289000  | 17.574948000 |
| 9  | 5.280951000  | 11.808262000 | 9.558424000  |
| 9  | 4.544688000  | 5.800702000  | 11.126381000 |
| 9  | 10.183662000 | 9.684054000  | 16.101366000 |
| 9  | 10.090675000 | 8.145315000  | 17.614884000 |
| 9  | 6.070612000  | 13.779549000 | 9.857332000  |
| 9  | 6.809873000  | 11.091170000 | 15.852687000 |
| 9  | 5.252223000  | 3.781299000  | 11.298946000 |
| 7  | 9.543977000  | 10.138752000 | 9.817985000  |
| 7  | 10.400127000 | 9.163017000  | 10.100716000 |
| 7  | 3.520039000  | 9.847805000  | 11.044192000 |
| 9  | 10.246082000 | 13.034197000 | 7.852752000  |
| 9  | 13.885655000 | 9.270684000  | 9.874691000  |
| 6  | 3.393981000  | 10.100870000 | 12.397173000 |
| 7  | 8.225549000  | 8.392537000  | 14.644449000 |
| 9  | 6.338488000  | 4.492471000  | 15.787391000 |
| 7  | 7.263231000  | 6.239460000  | 10.874011000 |
| 7  | 11.784894000 | 7.280677000  | 14.792507000 |
| 9  | 6.483260000  | 13.216053000 | 15.765839000 |
| 7  | 7.425861000  | 7.460606000  | 14.135011000 |
| 9  | 8.445358000  | 12.398873000 | 15.401807000 |
| 7  | 6.436790000  | 8.910704000  | 9.317350000  |
| 6  | 11.586587000 | 9.478854000  | 9.564405000  |
| 7  | 4.590910000  | 7.817033000  | 8.707230000  |
| 9  | 10.345450000 | 6.651826000  | 8.182251000  |
| 6  | 7.868086000  | 6.859183000  | 16.248349000 |
| 9  | 9.786451000  | 4.681905000  | 7.517243000  |
| 9  | 12.640049000 | 7.681390000  | 10.641253000 |
| 9  | 5.005817000  | 5.799562000  | 14.709434000 |
| 9  | 6.557833000  | 4.760645000  | 13.662387000 |
| 7  | 10.715023000 | 10.141411000 | 13.042041000 |
| 6  | 11.671690000 | 9.261849000  | 13.246320000 |
| 7  | 8.488074000  | 6.377155000  | 10.375541000 |
| 7  | 7.442512000  | 11.234212000 | 12.956251000 |
| 7  | 12.906345000 | 9.735365000  | 12.939425000 |
| 9  | 12.964389000 | 7.882248000  | 8.528522000  |
| 9  | 9.050404000  | 13.065226000 | 9.639306000  |
| 6  | 12.725940000 | 11.030174000 | 12.488067000 |
| 6  | 4.447397000  | 9.406410000  | 13.018500000 |
| 6  | 5.247146000  | 4.849619000  | 10.501495000 |
| 6  | 7.828701000  | 7.453875000  | 6.198714000  |
| 6  | 5.193207000  | 8.613635000  | 9.627424000  |
| 6  | 7.857203000  | 8.224185000  | 7.349591000  |
| 6  | 9.602380000  | 4.840308000  | 13.396109000 |
| 6  | 9.619996000  | 3.817753000  | 14.330431000 |
| 6  | 8.509016000  | 8.052109000  | 15.909895000 |
| 6  | 4.606894000  | 9.046272000  | 10.904141000 |
| 6  | 6.622197000  | 5.305931000  | 10.155292000 |
| 6  | 11.168095000 | 6.043641000  | 14.830292000 |
| 6  | 5.399050000  | 12.794183000 | 10.455277000 |

|   |              |              |              |
|---|--------------|--------------|--------------|
| 7 | 6.981432000  | 11.364535000 | 11.715793000 |
| 7 | 10.539826000 | 7.138631000  | 12.947007000 |
| 6 | 11.197352000 | 5.010008000  | 15.774032000 |
| 6 | 10.388588000 | 5.967810000  | 13.662706000 |
| 6 | 2.486000000  | 10.882683000 | 13.121304000 |
| 6 | 6.059730000  | 12.337667000 | 11.711419000 |
| 6 | 13.623585000 | 11.990422000 | 12.006986000 |
| 7 | 5.182271000  | 8.751762000  | 12.049705000 |
| 6 | 10.407828000 | 3.901653000  | 15.501273000 |
| 6 | 7.136696000  | 12.206398000 | 15.194787000 |
| 6 | 11.342396000 | 11.270121000 | 12.556118000 |
| 6 | 5.533666000  | 7.573877000  | 7.725142000  |
| 6 | 10.801072000 | 12.488940000 | 12.130285000 |
| 6 | 11.683393000 | 13.440557000 | 11.645096000 |
| 6 | 7.199322000  | 6.530999000  | 15.073780000 |
| 6 | 13.074719000 | 13.194280000 | 11.587151000 |
| 6 | 7.455146000  | 4.810541000  | 9.151287000  |
| 6 | 12.765032000 | 8.571441000  | 9.651390000  |
| 6 | 11.508916000 | 10.702966000 | 8.897955000  |
| 6 | 8.626284000  | 5.538806000  | 9.339862000  |
| 6 | 10.183059000 | 11.072724000 | 9.098369000  |
| 6 | 2.682362000  | 10.946446000 | 14.493735000 |
| 6 | 3.740938000  | 10.255880000 | 15.126852000 |
| 6 | 5.496030000  | 6.800693000  | 6.558374000  |
| 6 | 4.630302000  | 9.475897000  | 14.405803000 |
| 9 | 10.892954000 | 4.942269000  | 9.348727000  |
| 6 | 6.664167000  | 6.752005000  | 5.810265000  |
| 6 | 6.277883000  | 5.389816000  | 14.806023000 |
| 6 | 5.914595000  | 12.874204000 | 12.991839000 |
| 6 | 11.363126000 | 7.884015000  | 13.652204000 |
| 6 | 9.914827000  | 5.457009000  | 8.592472000  |
| 6 | 6.688977000  | 8.270441000  | 8.121018000  |
| 6 | 6.819353000  | 12.126255000 | 13.739463000 |
| 9 | 8.368620000  | 11.972468000 | 7.926844000  |
| 6 | 9.349656000  | 8.904820000  | 16.796760000 |
| 6 | 9.462300000  | 12.291451000 | 8.631573000  |
| 1 | 2.007678000  | 11.549967000 | 15.099954000 |
| 1 | 1.673836000  | 11.419926000 | 12.634226000 |
| 1 | 3.867056000  | 10.352756000 | 16.204214000 |
| 1 | 5.465075000  | 8.962804000  | 14.877003000 |
| 1 | 4.602950000  | 6.255337000  | 6.257544000  |
| 1 | 6.685205000  | 6.156072000  | 4.898399000  |
| 1 | 8.724791000  | 7.376683000  | 5.584486000  |
| 1 | 8.749769000  | 8.752874000  | 7.676704000  |
| 1 | 7.239693000  | 4.057133000  | 8.402697000  |
| 1 | 8.977101000  | 4.809375000  | 12.506595000 |
| 1 | 9.002692000  | 2.934966000  | 14.170068000 |
| 1 | 10.390391000 | 3.074456000  | 16.210068000 |
| 1 | 11.798521000 | 5.074539000  | 16.679479000 |
| 1 | 7.895339000  | 6.316325000  | 17.185900000 |
| 1 | 5.256654000  | 13.669240000 | 13.322391000 |
| 1 | 12.288942000 | 11.236397000 | 8.367231000  |
| 1 | 14.694095000 | 11.800105000 | 11.951116000 |
| 1 | 13.733797000 | 13.969503000 | 11.197797000 |
| 1 | 11.298359000 | 14.392778000 | 11.282886000 |
| 1 | 9.724215000  | 12.643659000 | 12.152259000 |
| 6 | 3.234550000  | 7.300597000  | 8.731328000  |
| 1 | 2.597616000  | 7.857788000  | 8.036213000  |

|   |              |              |              |
|---|--------------|--------------|--------------|
| 1 | 3.248419000  | 6.244406000  | 8.453883000  |
| 1 | 2.831228000  | 7.378787000  | 9.743770000  |
| 6 | 2.673316000  | 10.393671000 | 9.999857000  |
| 1 | 3.149866000  | 10.245878000 | 9.028359000  |
| 1 | 1.692892000  | 9.906090000  | 10.006385000 |
| 1 | 2.552509000  | 11.467997000 | 10.160218000 |
| 6 | 12.686745000 | 7.813287000  | 15.797300000 |

|   |              |             |              |
|---|--------------|-------------|--------------|
| 1 | 12.253656000 | 7.657251000 | 16.787744000 |
| 1 | 13.663138000 | 7.320886000 | 15.737721000 |
| 1 | 12.807596000 | 8.888188000 | 15.644389000 |
| 6 | 14.169289000 | 9.023504000 | 13.012338000 |
| 1 | 14.759728000 | 9.367913000 | 13.867879000 |
| 1 | 13.977489000 | 7.951975000 | 13.107370000 |
| 1 | 14.726970000 | 9.187684000 | 12.087776000 |

Cu4Pz4L2 with S4 symmetry (1), E=-  
11920.71430051; H=-11919.77776817; G=-  
11919.97154329

|    |              |              |              |
|----|--------------|--------------|--------------|
| 29 | 1.334759000  | 1.191476000  | 1.043567000  |
| 9  | -1.299653000 | 4.949455000  | -2.663578000 |
| 9  | -1.191599000 | 3.005337000  | -3.562621000 |
| 9  | 0.163808000  | 4.569635000  | -4.184084000 |
| 7  | 1.313617000  | 2.532714000  | -0.386691000 |
| 7  | -1.075298000 | 1.229869000  | 4.448992000  |
| 9  | 4.224849000  | 4.597885000  | -0.419691000 |
| 7  | 0.292873000  | 2.613394000  | -1.235344000 |
| 9  | 4.140347000  | 2.561040000  | 0.275259000  |
| 6  | 0.542598000  | 3.608464000  | -2.098635000 |
| 7  | 0.059106000  | 1.532669000  | 2.552686000  |
| 9  | 3.113112000  | 4.097763000  | 1.357730000  |
| 6  | -0.239058000 | 0.695625000  | 3.521734000  |
| 6  | -1.487325000 | 4.908686000  | 2.666400000  |
| 1  | -1.570855000 | 5.859316000  | 2.141606000  |
| 6  | 2.209441000  | 3.476821000  | -0.706796000 |
| 6  | 3.429836000  | 3.679123000  | 0.125017000  |
| 6  | -1.625284000 | 0.590844000  | 5.630165000  |
| 1  | -2.709629000 | 0.727451000  | 5.642647000  |
| 1  | -1.188191000 | 1.022186000  | 6.536892000  |
| 1  | -1.416586000 | -0.480700000 | 5.596935000  |
| 6  | -1.346095000 | 2.519614000  | 4.032970000  |
| 6  | -0.451427000 | 4.030461000  | -3.125779000 |
| 6  | -0.683156000 | 3.910445000  | 2.141057000  |
| 1  | -0.133090000 | 4.033859000  | 1.210806000  |
| 6  | -2.213992000 | 4.718261000  | 3.863829000  |
| 1  | -2.836385000 | 5.529725000  | 4.239403000  |
| 6  | 1.766940000  | 4.209669000  | -1.803873000 |
| 1  | 2.253552000  | 5.038501000  | -2.304354000 |
| 6  | -2.156200000 | 3.525950000  | 4.572033000  |
| 1  | -2.715941000 | 3.381464000  | 5.494664000  |
| 6  | -0.625029000 | 2.697481000  | 2.839365000  |
| 7  | 1.075308000  | -1.229859000 | 4.448997000  |
| 7  | -0.059094000 | -1.532664000 | 2.552692000  |
| 6  | 0.239069000  | -0.695617000 | 3.521736000  |
| 6  | 1.487344000  | -4.908677000 | 2.666409000  |
| 1  | 1.570877000  | -5.859306000 | 2.141616000  |
| 6  | 1.625290000  | -0.590830000 | 5.630170000  |
| 1  | 2.709636000  | -0.727435000 | 5.642655000  |
| 1  | 1.188196000  | -1.022172000 | 6.536897000  |
| 1  | 1.416590000  | 0.480713000  | 5.596938000  |
| 6  | 1.346108000  | -2.519604000 | 4.032977000  |
| 6  | 0.683174000  | -3.910438000 | 2.141066000  |
| 1  | 0.133108000  | -4.033854000 | 1.210814000  |
| 6  | 2.214011000  | -4.718249000 | 3.863839000  |
| 1  | 2.836405000  | -5.529711000 | 4.239413000  |
| 6  | 2.156215000  | -3.525937000 | 4.572042000  |
| 1  | 2.715955000  | -3.381449000 | 5.494673000  |
| 6  | 0.625043000  | -2.697474000 | 2.839372000  |

|    |              |              |              |
|----|--------------|--------------|--------------|
| 29 | -1.334750000 | -1.191478000 |              |
|    | 1.043574000  |              |              |
| 9  | 1.299650000  | -4.949418000 | -2.663629000 |
| 9  | 1.191541000  | -3.005297000 | -3.562659000 |
| 9  | -0.163851000 | -4.569616000 | -4.184100000 |
| 7  | -1.313610000 | -2.532724000 | -0.386677000 |
| 9  | -4.224801000 | -4.597955000 | -0.419569000 |
| 7  | -0.292878000 | -2.613395000 | -1.235344000 |
| 9  | -4.140308000 | -2.561110000 | 0.275381000  |
| 6  | -0.542612000 | -3.608461000 | -2.098638000 |
| 9  | -3.112995000 | -4.097815000 | 1.357803000  |
| 6  | -2.209424000 | -3.476846000 | -0.706758000 |
| 6  | -3.429782000 | -3.679178000 | 0.125105000  |
| 6  | 0.451397000  | -4.030437000 | -3.125806000 |
| 6  | -1.766941000 | -4.209681000 | -1.803851000 |
| 1  | -2.253553000 | -5.038519000 | -2.304323000 |
| 29 | 1.191476000  | -1.334756000 | -            |
|    | 1.043563000  |              |              |
| 9  | 4.949417000  | 1.299644000  | 2.663628000  |
| 9  | 3.005297000  | 1.191547000  | 3.562660000  |
| 9  | 4.569613000  | -0.163842000 | 4.184113000  |
| 7  | 2.532719000  | -1.313616000 | 0.386689000  |
| 7  | 1.229868000  | 1.075311000  | -4.448982000 |
| 9  | 4.597892000  | -4.224845000 | 0.419623000  |
| 7  | 2.613394000  | -0.292881000 | 1.235352000  |
| 9  | 2.561060000  | -4.140305000 | -0.275367000 |
| 6  | 3.608455000  | -0.542618000 | 2.098650000  |
| 7  | 1.532667000  | -0.059100000 | -2.552681000 |
| 9  | 4.097812000  | -3.113038000 | -1.357763000 |
| 6  | 0.695623000  | 0.239067000  | -3.521727000 |
| 6  | 4.908679000  | 1.487343000  | -2.666380000 |
| 1  | 5.859306000  | 1.570875000  | -2.141583000 |
| 6  | 3.476830000  | -2.209438000 | 0.706780000  |
| 6  | 3.679144000  | -3.429806000 | -0.125071000 |
| 6  | 0.590842000  | 1.625300000  | -5.630154000 |
| 1  | 0.727447000  | 2.709646000  | -5.642632000 |
| 1  | 1.022186000  | 1.188211000  | -6.536882000 |
| 1  | -0.480701000 | 1.416600000  | -5.596926000 |
| 6  | 2.519611000  | 1.346109000  | -4.032957000 |
| 6  | 4.030435000  | 0.451397000  | 3.125812000  |
| 6  | 3.910440000  | 0.683165000  | -2.141046000 |
| 1  | 4.033855000  | 0.133094000  | -1.210797000 |
| 6  | 4.718253000  | 2.214016000  | -3.863806000 |
| 1  | 5.529715000  | 2.836416000  | -4.239373000 |
| 6  | 4.209668000  | -1.766953000 | 1.803872000  |
| 1  | 5.038500000  | -2.253569000 | 2.304349000  |
| 6  | 3.525945000  | 2.156221000  | -4.572014000 |
| 1  | 3.381459000  | 2.715967000  | -5.494642000 |
| 6  | 2.697479000  | 0.625038000  | -2.839355000 |
| 7  | -1.229862000 | -1.075290000 | -4.448998000 |
| 7  | -1.532666000 | 0.059102000  | -2.552685000 |
| 6  | -0.695619000 | -0.239058000 | -3.521731000 |

|             |              |              |              |   |              |              |              |
|-------------|--------------|--------------|--------------|---|--------------|--------------|--------------|
| 6           | -4.908688000 | -1.487317000 | -2.666425000 | 9 | -4.949398000 | -1.299672000 | 2.663641000  |
| 1           | -5.859320000 | -1.570845000 | -2.141637000 | 9 | -3.005282000 | -1.191541000 | 3.562676000  |
| 6           | -0.590833000 | -1.625266000 | -5.630174000 | 9 | -4.569617000 | 0.163835000  | 4.184111000  |
| 1           | -0.727442000 | -2.709611000 | -5.642666000 | 7 | -2.532724000 | 1.313605000  | 0.386689000  |
| 1           | -1.022171000 | -1.188164000 | -6.536898000 | 9 | -4.598009000 | 4.224755000  | 0.419531000  |
| 1           | 0.480711000  | -1.416570000 | -5.596938000 | 7 | -2.613391000 | 0.292872000  | 1.235357000  |
| 6           | -2.519609000 | -1.346086000 | -4.032983000 | 9 | -2.561158000 | 4.140294000  | -0.275408000 |
| 6           | -3.910446000 | -0.683154000 | -2.141074000 | 6 | -3.608459000 | 0.542602000  | 2.098650000  |
| 1           | -4.033864000 | -0.133093000 | -1.210819000 | 9 | -4.097835000 | 3.112928000  | -1.357817000 |
| 6           | -4.718260000 | -2.213976000 | -3.863859000 | 6 | -3.476859000 | 2.209407000  | 0.706760000  |
| 1           | -5.529725000 | -2.836363000 | -4.239441000 | 6 | -3.679212000 | 3.429747000  | -0.125123000 |
| 6           | -3.525945000 | -2.156183000 | -4.572057000 | 6 | -4.030428000 | -0.451409000 | 3.125819000  |
| 1           | -3.381457000 | -2.715917000 | -5.494692000 | 6 | -4.209692000 | 1.766924000  | 1.803855000  |
| 6           | -2.697479000 | -0.625028000 | -2.839374000 | 1 | -5.038540000 | 2.253526000  | 2.304318000  |
| 29          | -1.191478000 | 1.334751000  | -            |   |              |              |              |
| 1.043562000 |              |              |              |   |              |              |              |

Cu4Pz4L1 (2), E=-11083.66278829; H=-11083.02143370  
; G=-11083.18456561

|    |              |              |              |
|----|--------------|--------------|--------------|
| 29 | 20.943188000 | 0.957267000  | 13.954979000 |
| 29 | 21.595572000 | 4.069828000  | 14.461158000 |
| 29 | 18.844764000 | 2.775814000  | 12.994912000 |
| 29 | 18.916099000 | 4.593039000  | 15.551830000 |
| 9  | 22.910315000 | 4.918277000  | 17.255477000 |
| 9  | 20.849306000 | 5.121939000  | 17.812047000 |
| 9  | 18.488308000 | 3.193094000  | 9.732151000  |
| 9  | 22.221943000 | 4.167724000  | 19.158376000 |
| 9  | 16.487648000 | -1.059132000 | 14.553293000 |
| 9  | 18.439497000 | -0.752940000 | 13.715004000 |
| 9  | 18.712117000 | 3.338446000  | 18.571902000 |
| 9  | 22.721585000 | -1.032023000 | 12.517359000 |
| 9  | 21.277458000 | -2.432704000 | 11.777230000 |
| 9  | 16.757609000 | 0.302751000  | 12.903286000 |
| 9  | 17.234885000 | 1.455069000  | 9.737406000  |
| 9  | 16.679704000 | 3.868147000  | 18.145894000 |
| 9  | 22.697144000 | -1.557355000 | 10.423135000 |
| 9  | 17.125174000 | 1.959238000  | 19.039251000 |
| 7  | 19.596623000 | 1.426474000  | 11.658420000 |
| 7  | 20.514462000 | 0.605834000  | 12.166786000 |
| 7  | 21.562749000 | 2.793373000  | 15.942961000 |
| 7  | 18.028349000 | 2.149243000  | 14.652210000 |
| 9  | 18.740508000 | 1.682629000  | 8.215713000  |
| 7  | 18.105714000 | 2.920849000  | 15.741802000 |
| 7  | 21.263399000 | 1.512803000  | 15.708657000 |
| 7  | 20.195040000 | 6.224100000  | 11.151519000 |
| 7  | 21.052824000 | 5.993288000  | 14.647782000 |
| 7  | 22.060795000 | 3.620572000  | 12.581747000 |
| 7  | 19.186730000 | 4.580675000  | 12.268266000 |
| 7  | 19.844036000 | 6.176341000  | 15.178652000 |
| 9  | 21.943428000 | -1.290359000 | 16.635756000 |
| 7  | 21.956517000 | 3.576120000  | 10.355642000 |
| 9  | 20.451397000 | -0.949910000 | 18.149814000 |
| 9  | 19.905801000 | -0.953776000 | 16.064827000 |
| 6  | 20.267555000 | 4.950001000  | 11.613918000 |
| 9  | 18.460253000 | 8.278199000  | 17.035841000 |
| 6  | 21.443814000 | 4.071865000  | 11.510418000 |
| 6  | 18.966631000 | 6.716509000  | 11.550981000 |
| 6  | 23.044651000 | 2.771121000  | 12.120435000 |
| 6  | 20.974674000 | -0.192002000 | 11.194342000 |
| 6  | 21.112881000 | 0.882969000  | 16.881929000 |
| 6  | 21.901108000 | 4.302254000  | 17.872962000 |
| 9  | 23.035666000 | 8.531248000  | 13.127532000 |
| 6  | 18.341295000 | 5.669694000  | 12.248153000 |
| 6  | 21.617936000 | 2.964570000  | 17.269507000 |
| 6  | 21.338932000 | 1.769277000  | 17.929017000 |

|   |              |              |              |
|---|--------------|--------------|--------------|
| 1 | 21.298306000 | 1.580119000  | 18.994720000 |
| 6 | 22.987163000 | 2.728509000  | 10.717614000 |
| 6 | 17.300451000 | -0.138046000 | 14.038403000 |
| 6 | 17.649148000 | 2.227489000  | 16.793628000 |
| 6 | 17.509214000 | 0.971033000  | 15.019531000 |
| 6 | 17.070376000 | 5.836656000  | 12.811510000 |
| 1 | 16.604185000 | 5.020058000  | 13.361978000 |
| 6 | 23.977306000 | 2.001851000  | 12.827688000 |
| 1 | 24.003373000 | 2.035796000  | 13.916285000 |
| 6 | 19.476490000 | 1.153543000  | 10.356047000 |
| 6 | 21.929495000 | -1.304361000 | 11.480741000 |
| 9 | 23.830717000 | 7.164904000  | 14.591630000 |
| 6 | 20.334867000 | 0.112194000  | 9.995635000  |
| 1 | 20.467508000 | -0.348424000 | 9.023543000  |
| 6 | 18.363561000 | 7.970295000  | 11.396012000 |
| 1 | 18.856187000 | 8.783962000  | 10.866228000 |
| 6 | 21.491215000 | 3.805171000  | 9.000372000  |
| 1 | 20.570427000 | 4.390991000  | 9.022914000  |
| 1 | 21.274060000 | 2.844738000  | 8.521385000  |
| 1 | 22.252223000 | 4.339399000  | 8.422308000  |
| 6 | 18.479926000 | 1.873751000  | 9.508151000  |
| 6 | 23.841019000 | 1.915468000  | 9.963442000  |
| 1 | 23.783531000 | 1.872834000  | 8.877102000  |
| 9 | 17.278182000 | 7.134605000  | 15.661808000 |
| 6 | 21.512494000 | 7.184694000  | 14.252436000 |
| 9 | 23.116424000 | 6.418005000  | 12.715397000 |
| 6 | 17.108725000 | 8.127054000  | 11.967687000 |
| 1 | 16.603219000 | 9.088249000  | 11.883906000 |
| 6 | 19.534581000 | 7.478863000  | 15.121462000 |
| 6 | 17.244956000 | 0.960425000  | 16.387584000 |
| 1 | 16.823274000 | 0.162948000  | 16.987074000 |
| 6 | 16.468231000 | 7.074746000  | 12.660874000 |
| 1 | 15.487414000 | 7.250752000  | 13.100041000 |
| 6 | 24.827649000 | 1.198315000  | 12.086108000 |
| 1 | 25.558448000 | 0.574417000  | 12.598685000 |
| 6 | 21.210070000 | 6.979352000  | 10.441123000 |
| 1 | 21.423638000 | 7.904941000  | 10.985307000 |
| 1 | 20.866243000 | 7.218819000  | 9.429601000  |
| 1 | 22.130511000 | 6.395628000  | 10.385392000 |
| 6 | 24.756580000 | 1.153379000  | 10.675172000 |
| 1 | 25.435591000 | 0.497888000  | 10.131570000 |
| 6 | 20.847876000 | -0.586234000 | 16.934321000 |
| 6 | 17.545461000 | 2.851441000  | 18.147215000 |
| 6 | 22.879877000 | 7.324475000  | 13.670365000 |
| 6 | 18.282211000 | 8.008452000  | 15.739074000 |
| 9 | 17.900247000 | 9.137787000  | 15.147895000 |
| 6 | 20.581290000 | 8.185680000  | 14.537108000 |
| 1 | 20.655403000 | 9.250648000  | 14.351018000 |



Ag4Pz4L2 (3), E=-26783.43245433; H=-26782.49707379;  
G=-26782.69606477

|    |              |              |              |
|----|--------------|--------------|--------------|
| 47 | 7.698760000  | 10.269933000 | 10.328614000 |
| 47 | 6.598982000  | 7.395405000  | 12.398274000 |
| 47 | 9.865845000  | 7.544218000  | 11.033484000 |
| 47 | 8.696800000  | 9.903845000  | 13.706593000 |
| 9  | 4.023531000  | 13.413384000 | 10.712271000 |
| 9  | 4.348750000  | 4.443407000  | 9.298789000  |
| 9  | 8.737532000  | 9.338005000  | 17.837244000 |
| 9  | 5.271665000  | 12.031511000 | 9.619923000  |
| 9  | 4.416770000  | 5.834816000  | 10.951303000 |
| 9  | 10.261614000 | 9.339128000  | 16.327674000 |
| 9  | 10.233231000 | 7.793680000  | 17.837441000 |
| 9  | 5.961825000  | 14.022769000 | 10.011224000 |
| 9  | 6.537828000  | 11.113010000 | 15.946290000 |
| 9  | 5.002715000  | 3.793957000  | 11.240056000 |
| 7  | 9.787452000  | 10.285545000 | 9.606915000  |
| 7  | 10.636825000 | 9.308654000  | 9.894021000  |
| 7  | 3.385359000  | 10.011471000 | 10.854854000 |
| 9  | 10.500391000 | 13.258114000 | 7.777808000  |
| 9  | 14.147404000 | 9.414553000  | 9.732974000  |
| 6  | 3.213580000  | 10.318800000 | 12.192172000 |
| 7  | 8.176009000  | 8.133958000  | 14.985403000 |
| 9  | 6.595953000  | 4.035650000  | 15.877389000 |
| 7  | 7.172338000  | 6.001317000  | 10.750437000 |
| 7  | 12.009093000 | 7.334954000  | 14.903225000 |
| 9  | 5.832717000  | 13.148098000 | 15.952565000 |
| 7  | 7.388663000  | 7.207266000  | 14.455716000 |
| 9  | 7.930998000  | 12.717608000 | 15.688805000 |
| 7  | 6.293274000  | 8.861291000  | 9.238152000  |
| 6  | 11.847430000 | 9.662960000  | 9.446860000  |
| 7  | 4.405368000  | 7.831209000  | 8.651138000  |
| 9  | 10.235852000 | 6.374949000  | 8.068535000  |
| 6  | 8.073640000  | 6.426342000  | 16.441966000 |
| 9  | 9.540724000  | 4.501027000  | 7.258823000  |
| 9  | 12.879568000 | 7.876375000  | 10.563178000 |
| 9  | 5.182469000  | 5.304406000  | 14.852086000 |
| 9  | 6.829307000  | 4.458673000  | 13.777553000 |
| 7  | 10.877257000 | 10.150962000 | 13.117862000 |
| 6  | 11.833703000 | 9.268163000  | 13.304408000 |
| 7  | 8.390749000  | 6.087727000  | 10.234071000 |
| 7  | 7.221288000  | 11.462929000 | 13.131347000 |
| 7  | 13.061915000 | 9.731671000  | 12.954862000 |
| 9  | 13.168651000 | 8.005037000  | 8.441494000  |
| 9  | 9.317898000  | 13.224978000 | 9.575280000  |
| 6  | 12.874977000 | 11.020939000 | 12.491904000 |
| 6  | 4.209052000  | 9.602276000  | 12.879588000 |
| 6  | 5.055550000  | 4.806224000  | 10.372007000 |
| 6  | 7.643398000  | 7.230062000  | 6.188875000  |
| 6  | 5.035683000  | 8.635784000  | 9.546964000  |
| 6  | 7.699678000  | 8.034637000  | 7.315162000  |
| 6  | 9.893828000  | 4.785762000  | 13.600109000 |
| 6  | 9.967017000  | 3.785193000  | 14.555601000 |
| 6  | 8.604771000  | 7.688911000  | 16.172756000 |
| 6  | 4.440513000  | 9.157440000  | 10.789350000 |
| 6  | 6.453934000  | 5.159962000  | 9.997613000  |
| 6  | 11.433495000 | 6.080577000  | 14.983275000 |
| 6  | 5.283285000  | 13.003468000 | 10.543199000 |

|   |              |              |              |
|---|--------------|--------------|--------------|
| 7 | 6.850088000  | 11.630695000 | 11.867666000 |
| 7 | 10.737895000 | 7.105986000  | 13.085011000 |
| 6 | 11.517047000 | 5.070333000  | 15.948708000 |
| 6 | 10.638880000 | 5.949707000  | 13.830508000 |
| 6 | 2.310954000  | 11.159182000 | 12.855401000 |
| 6 | 5.871521000  | 12.543437000 | 11.833413000 |
| 6 | 13.766756000 | 11.971109000 | 11.981007000 |
| 7 | 4.953495000  | 8.884421000  | 11.968347000 |
| 6 | 10.766965000 | 3.927230000  | 15.712557000 |
| 6 | 6.692509000  | 12.313960000 | 15.376139000 |
| 6 | 11.494959000 | 11.269908000 | 12.599138000 |
| 6 | 5.345001000  | 7.505374000  | 7.690511000  |
| 6 | 10.952933000 | 12.493646000 | 12.184407000 |
| 6 | 11.829649000 | 13.435526000 | 11.670282000 |
| 6 | 7.311156000  | 6.174986000  | 15.304962000 |
| 6 | 13.216220000 | 13.177333000 | 11.571723000 |
| 6 | 7.229983000  | 4.663401000  | 8.948354000  |
| 6 | 13.010643000 | 8.738141000  | 9.545539000  |
| 6 | 11.793541000 | 10.915580000 | 8.832014000  |
| 6 | 8.451621000  | 5.299446000  | 9.153253000  |
| 6 | 10.451192000 | 11.257114000 | 8.967744000  |
| 6 | 2.454552000  | 11.256271000 | 14.232295000 |
| 6 | 3.455400000  | 10.542623000 | 14.931089000 |
| 6 | 5.280655000  | 6.695970000  | 6.549815000  |
| 6 | 4.340008000  | 9.705933000  | 14.270532000 |
| 9 | 10.670255000 | 4.545284000  | 9.093236000  |
| 6 | 6.450326000  | 6.570331000  | 5.813736000  |
| 6 | 6.480621000  | 4.987194000  | 14.956578000 |
| 6 | 5.592989000  | 13.005062000 | 13.120392000 |
| 6 | 11.546856000 | 7.896058000  | 13.755434000 |
| 6 | 9.724447000  | 5.179161000  | 8.386892000  |
| 6 | 6.527664000  | 8.162783000  | 8.072956000  |
| 6 | 6.483467000  | 12.273674000 | 13.900790000 |
| 9 | 8.626688000  | 12.184442000 | 7.832606000  |
| 6 | 9.458833000  | 8.540529000  | 17.045776000 |
| 6 | 9.728310000  | 12.487239000 | 8.535994000  |
| 1 | 1.781322000  | 11.904137000 | 14.792585000 |
| 1 | 1.543788000  | 11.716359000 | 12.320324000 |
| 1 | 3.541129000  | 10.668352000 | 16.009522000 |
| 1 | 5.133594000  | 9.170852000  | 14.790282000 |
| 1 | 4.366120000  | 6.181015000  | 6.260366000  |
| 1 | 6.451133000  | 5.944501000  | 4.921871000  |
| 1 | 8.539125000  | 7.089260000  | 5.585655000  |
| 1 | 8.615745000  | 8.532471000  | 7.629907000  |
| 1 | 6.950021000  | 3.969693000  | 8.164480000  |
| 1 | 9.264484000  | 4.702079000  | 12.715305000 |
| 1 | 9.385060000  | 2.874148000  | 14.423618000 |
| 1 | 10.793307000 | 3.116162000  | 16.439476000 |
| 1 | 12.127852000 | 5.178515000  | 16.843317000 |
| 1 | 8.228358000  | 5.794674000  | 17.308617000 |
| 1 | 4.859441000  | 13.737391000 | 13.435746000 |
| 1 | 12.595248000 | 11.479153000 | 8.369168000  |
| 1 | 14.833538000 | 11.771400000 | 11.895714000 |
| 1 | 13.869680000 | 13.945890000 | 11.160360000 |
| 1 | 11.442702000 | 14.390361000 | 11.317506000 |
| 1 | 9.879904000  | 12.670385000 | 12.246011000 |
| 6 | 3.030792000  | 7.365949000  | 8.684137000  |
| 1 | 2.437902000  | 7.870066000  | 7.913604000  |

|   |              |              |              |
|---|--------------|--------------|--------------|
| 1 | 3.011385000  | 6.286445000  | 8.516696000  |
| 1 | 2.599611000  | 7.566378000  | 9.667887000  |
| 6 | 2.614739000  | 10.557663000 | 9.752585000  |
| 1 | 3.133228000  | 10.358637000 | 8.811671000  |
| 1 | 1.615791000  | 10.110151000 | 9.722732000  |
| 1 | 2.529917000  | 11.640374000 | 9.874567000  |
| 6 | 12.902937000 | 7.921863000  | 15.885193000 |

|   |              |             |              |
|---|--------------|-------------|--------------|
| 1 | 12.469455000 | 7.809018000 | 16.881861000 |
| 1 | 13.882256000 | 7.432878000 | 15.850983000 |
| 1 | 13.020761000 | 8.988542000 | 15.680236000 |
| 6 | 14.327398000 | 9.021716000 | 12.999888000 |
| 1 | 14.959729000 | 9.413593000 | 13.803657000 |
| 1 | 14.143311000 | 7.957673000 | 13.166861000 |
| 1 | 14.838326000 | 9.134954000 | 12.040718000 |

Ag4Pz4L1 (4), E=-25946.37822658; H=-25945.73666929;  
G=-25945.90790866

|    |              |              |              |
|----|--------------|--------------|--------------|
| 47 | 3.534111000  | 10.441989000 | 6.522722000  |
| 47 | 6.898589000  | 9.666322000  | 6.130021000  |
| 47 | 5.214956000  | 10.337246000 | 9.202737000  |
| 47 | 6.972204000  | 7.495154000  | 8.407026000  |
| 9  | 1.207780000  | 7.112360000  | 4.151169000  |
| 9  | 1.405664000  | 9.559064000  | 8.368695000  |
| 9  | 9.664656000  | 11.375432000 | 5.586160000  |
| 9  | 1.999931000  | 12.726666000 | 5.334148000  |
| 7  | 4.917228000  | 7.290894000  | 8.830933000  |
| 9  | 0.779234000  | 8.397461000  | 10.063988000 |
| 9  | 10.736673000 | 5.621121000  | 8.626965000  |
| 9  | 1.260251000  | 7.272049000  | 6.290670000  |
| 7  | 8.913006000  | 8.063872000  | 7.799426000  |
| 9  | 2.243235000  | 9.964187000  | 10.307356000 |
| 7  | 4.045147000  | 8.627157000  | 5.579902000  |
| 9  | 1.385408000  | 9.047440000  | 5.089621000  |
| 7  | 7.386349000  | 10.900580000 | 9.298195000  |
| 7  | 6.879468000  | 13.860294000 | 7.490971000  |
| 9  | 11.466901000 | 7.082798000  | 10.020499000 |
| 7  | 9.244592000  | 12.035580000 | 8.826475000  |
| 9  | 0.477859000  | 13.187863000 | 6.771884000  |
| 7  | 4.042613000  | 12.265947000 | 8.782182000  |
| 7  | 4.192320000  | 8.372625000  | 9.105129000  |
| 7  | 8.945471000  | 9.003735000  | 6.860338000  |
| 9  | 7.109736000  | 5.862478000  | 6.018119000  |
| 7  | 3.311064000  | 12.193987000 | 7.676302000  |
| 9  | 6.438166000  | 5.157802000  | 4.101855000  |
| 7  | 5.316034000  | 8.241668000  | 5.492643000  |
| 9  | 10.591495000 | 9.824551000  | 4.434597000  |
| 9  | 3.941341000  | 3.913616000  | 9.052642000  |
| 9  | 7.566090000  | 6.991015000  | 4.251490000  |
| 9  | 1.658540000  | 14.774418000 | 5.930330000  |
| 9  | 5.920366000  | 4.745526000  | 8.828578000  |
| 9  | 9.378773000  | 6.529246000  | 10.016531000 |
| 6  | 4.039683000  | 6.559895000  | 4.726980000  |
| 1  | 3.717774000  | 5.606208000  | 4.326178000  |
| 6  | 4.599116000  | 13.839856000 | 4.073575000  |
| 1  | 3.997908000  | 13.775922000 | 3.167958000  |
| 6  | 10.561367000 | 10.382491000 | 5.646716000  |
| 7  | 6.645761000  | 11.887040000 | 6.481025000  |
| 6  | 11.050458000 | 8.680889000  | 7.569560000  |
| 1  | 12.125337000 | 8.756087000  | 7.686501000  |
| 6  | 3.260185000  | 7.642803000  | 5.123800000  |
| 9  | 4.587815000  | 15.147582000 | 10.780541000 |
| 6  | 3.892976000  | 13.489824000 | 9.296118000  |
| 6  | 4.724390000  | 15.087919000 | 4.724914000  |
| 1  | 4.217060000  | 15.955695000 | 4.305926000  |
| 6  | 2.797586000  | 6.613020000  | 9.054248000  |
| 1  | 1.904253000  | 6.001167000  | 9.095290000  |
| 9  | 11.756961000 | 10.926318000 | 5.870177000  |
| 6  | 5.211804000  | 12.700109000 | 4.567785000  |
| 1  | 5.116101000  | 11.732006000 | 4.075942000  |
| 6  | 6.092326000  | 14.080542000 | 6.376579000  |
| 6  | 1.832536000  | 8.980360000  | 9.505143000  |
| 6  | 2.917217000  | 7.988532000  | 9.244761000  |
| 9  | 4.598436000  | 4.633505000  | 7.140627000  |

|   |              |              |              |
|---|--------------|--------------|--------------|
| 9 | 5.781840000  | 13.353259000 | 10.681393000 |
| 6 | 4.108948000  | 6.224196000  | 8.795837000  |
| 6 | 8.392986000  | 10.437514000 | 10.118737000 |
| 6 | 5.335642000  | 7.002730000  | 4.985977000  |
| 6 | 7.172086000  | 12.535086000 | 7.498447000  |
| 6 | 9.573726000  | 11.141758000 | 9.828060000  |
| 6 | 10.214204000 | 9.391783000  | 6.706080000  |
| 6 | 5.960911000  | 12.831799000 | 5.745610000  |
| 6 | 1.770611000  | 7.766327000  | 5.161326000  |
| 6 | 10.438228000 | 6.771933000  | 9.237840000  |
| 6 | 9.567610000  | 9.179352000  | 11.762282000 |
| 1 | 9.599433000  | 8.403557000  | 12.525684000 |
| 6 | 10.753299000 | 9.883878000  | 11.452506000 |
| 1 | 11.669333000 | 9.634499000  | 11.986046000 |
| 6 | 7.929427000  | 11.841052000 | 8.554891000  |
| 9 | 3.862132000  | 13.306842000 | 11.631180000 |
| 6 | 4.641503000  | 4.870451000  | 8.453589000  |
| 6 | 7.259230000  | 14.871016000 | 8.460787000  |
| 1 | 7.947525000  | 15.591934000 | 8.007397000  |
| 1 | 7.741518000  | 14.396719000 | 9.317685000  |
| 1 | 6.364657000  | 15.393183000 | 8.814076000  |
| 6 | 8.376967000  | 9.442374000  | 11.106000000 |
| 1 | 7.460019000  | 8.898105000  | 11.331920000 |
| 6 | 10.780768000 | 10.878415000 | 10.486628000 |
| 1 | 11.694653000 | 11.419675000 | 10.247742000 |
| 6 | 4.532411000  | 13.828894000 | 10.601008000 |
| 6 | 10.157392000 | 7.853287000  | 8.247263000  |
| 6 | 10.165191000 | 12.961632000 | 8.191974000  |
| 1 | 10.474608000 | 13.733506000 | 8.904258000  |
| 1 | 9.681755000  | 13.430860000 | 7.332413000  |
| 1 | 11.044963000 | 12.416877000 | 7.837039000  |
| 6 | 2.695400000  | 13.366272000 | 7.480111000  |
| 6 | 3.028450000  | 14.250867000 | 8.504350000  |
| 1 | 2.697349000  | 15.272627000 | 8.650941000  |
| 6 | 6.616528000  | 6.252331000  | 4.829853000  |
| 6 | 1.708518000  | 13.521933000 | 6.370756000  |
| 6 | 5.475512000  | 15.235509000 | 5.881388000  |
| 1 | 5.571525000  | 16.197569000 | 6.381879000  |
